# Supplementary material for: On the objectivity, reliability, and validity of deep learning enabled bioimage analyses
Source: eLife journal article supplement (doi:10.7554/elife.59780), 2020-10-19
Supplement: supp [file behavior_wue1.xlsx]

## Sheet: Tabelle1
mouse_id	condition	session	group	freeze	distance
#3	-	training	1	0	4237.6
#77	-	training	1	0.776119	3712.6
128 F10-2	-	training	1	0	2881
151 F5-62	-	training	1	2.71642	3812.3
065I F10-43	-	training	1	4.89552	2468.9
065I F10-25	-	training	1	0	2073.9
065I F14-42	-	training	1	4	2867.3
#1	+	training	2	16.0606	2273.1
128 F10-3	+	training	2	15.4242	1846.9
151 F5-47	+	training	2	8.39394	2691.7
065I F10-57	+	training	2	17.5758	2517.6
065I F14-23	+	training	2	7.8209	2081.1
065I F14-40	+	training	2	24.7463	1719.2
#3	-	retrieval	3	1.5	3265.7
#77	-	retrieval	3	2.08333	3148
128 F10-2	-	retrieval	3	8.63889	1847.2
151 F5-62	-	retrieval	3	9.02778	2499.2
065I F10-43	-	retrieval	3	14.25	2247.9
065I F10-25	-	retrieval	3	5.61111	2015.9
065I F14-42	-	retrieval	3	6.47222	2186.6
#1	+	retrieval	4	36.5	1642.1
128 F10-3	+	retrieval	4	65.0556	370.4
151 F5-47	+	retrieval	4	49.25	825
065I F10-57	+	retrieval	4	79.3056	306.3
065I F14-23	+	retrieval	4	34.5278	792.7
065I F14-40	+	retrieval	4	68.9167	334.1
