# Supplementary material for: On the objectivity, reliability, and validity of deep learning enabled bioimage analyses
Source: eLife journal article supplement (doi:10.7554/elife.59780), 2020-10-19
Supplement: supp [file elife-59780-supp-v1.zip]

A

DG

CA3

CA1

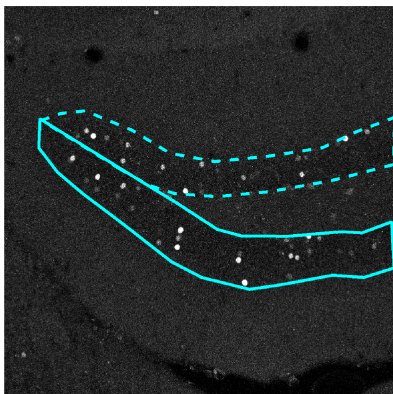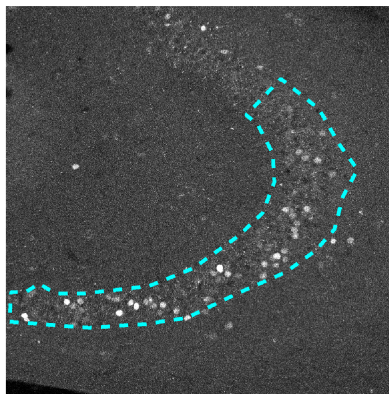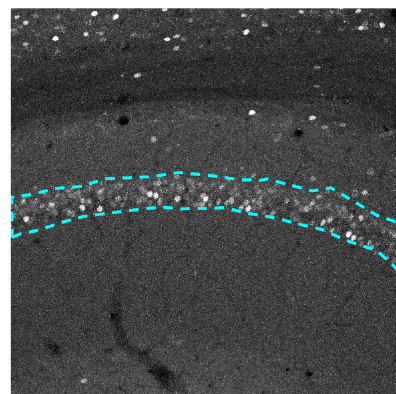

105 total images

12 in training dataset:

4 x H, 4 x C-, 4 x C+

106 total images

12 in training dataset:

4 x H, 4 x C-, 4 x C+

108 total images

12 in training dataset:

4 x H, 4 x C-, 4 x C+

B

manual annotations of five human experts and ground truth estimations

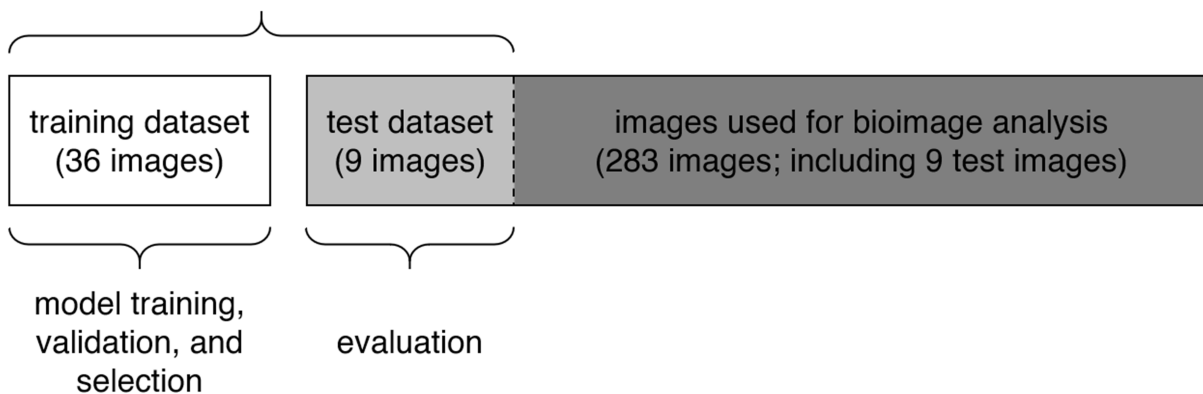

C

all 283 images

mean per image

features annotated  
by **cons. ensembles**  
(within NeuN+ area)

~ 10,000

~ 35
