# Supplementary material for: On the objectivity, reliability, and validity of deep learning enabled bioimage analyses
Source: eLife journal article supplement (doi:10.7554/elife.59780), 2020-10-19

A

feature also annotated by:

- experts only
- est. GT
- consensus ensemble
- est. GT & consensus ensemble

B

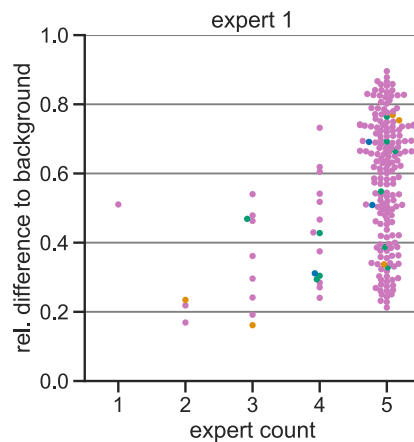

C

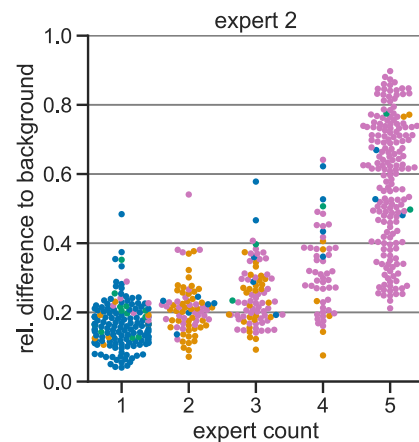

D

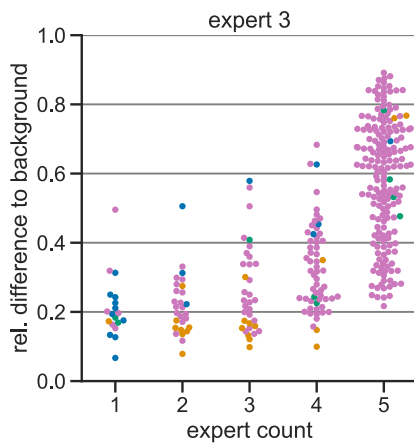

E

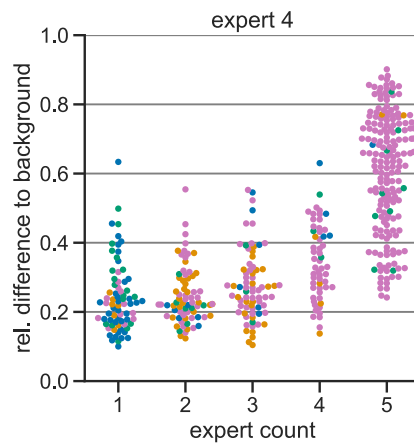

F

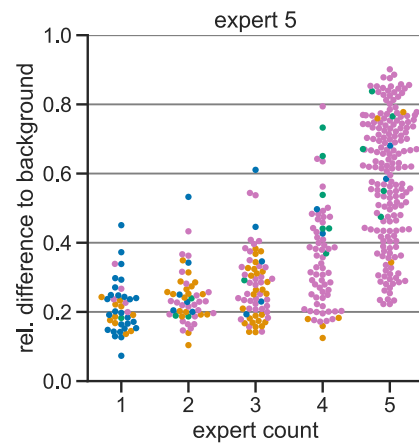

G

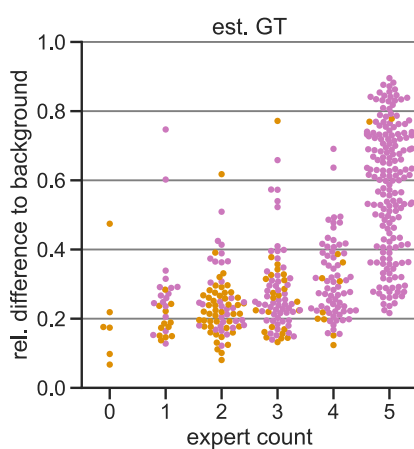

H

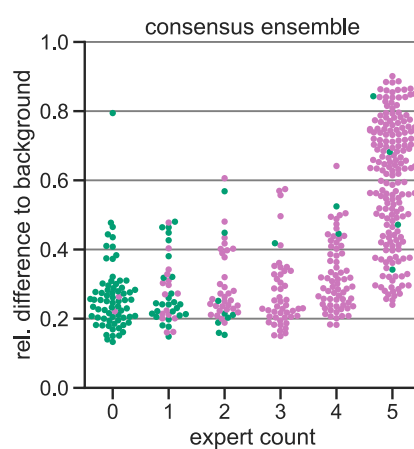

I

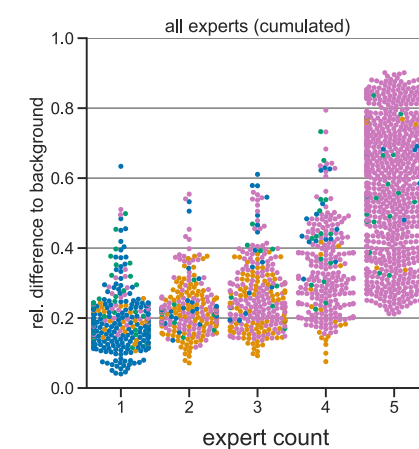

Supplement: supp [file elife-59780-supp-v1.zip]
