# Supplementary material for: On the objectivity, reliability, and validity of deep learning enabled bioimage analyses
Source: eLife journal article supplement (doi:10.7554/elife.59780), 2020-10-19
Supplement: supp [file elife-59780-supp-v1.zip]

## Sheet: CA1-#cFOS+ nuclei
CA1-#cFOS+ nuclei	group mean (normalized to H)			Kruskal-Wallis ANOVA		Mann-Whitney-U-test: H vs. C-			Mann-Whitney-U-test: H vs. C+			Mann-Whitney-U-test: C- vs. C+
model/ensemble	H	C-	C+	H-statistic	p-value	U-statistic	p-value	eta^2	U-statistic	p-value	eta^2	U-statistic	p-value	eta^2
wue1_consensus1_ensemble	1	5.86686	5.25722	62.7586	2.35582e-14	8	3.10748e-12	0.716255	28	1.23405e-10	0.648397	499	0.454292	0.00951771
wue1_consensus1_model1	1	4.8679	4.45195	60.8656	6.07017e-14	20	8.77211e-12	0.68631	32	1.75992e-10	0.637546	503	0.419351	0.0110692
wue1_consensus1_model2	1	6.55981	5.84224	62.9762	2.11298e-14	7	2.84729e-12	0.718779	27	1.12875e-10	0.651125	497	0.472361	0.00878586
wue1_consensus1_model3	1	5.28835	4.88818	64.6013	9.37555e-15	0	1.53743e-12	0.736573	20	6.01558e-11	0.670375	491	0.528865	0.00676595
wue1_consensus1_model4	1	5.60534	5.07712	62.088	3.29427e-14	12	4.40219e-12	0.706202	29	1.34893e-10	0.645676	493	0.509656	0.00740998
wue1_consensus2_ensemble	1	6.56351	5.79473	63.2045	1.885e-14	6	2.6085e-12	0.721308	28	1.23405e-10	0.648397	515	0.324449	0.0164264
wue1_consensus2_model1	1	6.35569	5.71088	62.588	2.56565e-14	10	3.69971e-12	0.711219	28	1.23405e-10	0.648397	506	0.394214	0.0123097
wue1_consensus2_model2	1	5.389	4.9441	63.335	1.766e-14	6	2.6085e-12	0.721308	24	8.62837e-11	0.659341	485	0.588622	0.00500951
wue1_consensus2_model3	1	5.33149	4.82427	61.7667	3.86842e-14	15	5.70742e-12	0.698709	29	1.34893e-10	0.645676	498	0.463277	0.00914813
wue1_consensus2_model4	1	8.88407	7.4657	63.5429	1.59163e-14	5	2.38938e-12	0.723841	26	1.03225e-10	0.653858	514	0.331778	0.0159397
wue1_consensus3_ensemble	1	6.94585	6.11585	63.5164	1.6128e-14	5	2.38938e-12	0.723841	26	1.03225e-10	0.653858	512	0.346754	0.0149883
wue1_consensus3_model1	1	6.08592	5.40406	62.4501	2.7487e-14	11	4.03599e-12	0.708709	29	1.34893e-10	0.645676	514	0.331778	0.0159397
wue1_consensus3_model2	1	6.86988	6.01087	63.4033	1.70665e-14	6	2.6085e-12	0.721308	26	1.03225e-10	0.653858	513	0.339213	0.0154603
wue1_consensus3_model3	1	6.08382	5.55546	63.0605	2.02578e-14	5	2.38938e-12	0.723841	28	1.23405e-10	0.648397	492	0.519215	0.00708431
wue1_consensus3_model4	1	8.17156	7.05499	63.9706	1.28518e-14	3	2.00393e-12	0.72892	24	8.62837e-11	0.659341	510	0.362153	0.0140662
wue1_consensus4_ensemble	1	6.64135	5.94728	63.2922	1.80419e-14	3	2.00393e-12	0.72892	29	1.34893e-10	0.645676	501	0.43662	0.0102788
wue1_consensus4_model1	1	6.46529	5.69249	61.8256	3.75606e-14	14	5.23497e-12	0.701202	31	1.61091e-10	0.64025	512	0.346754	0.0149883
wue1_consensus4_model2	1	6.66814	6.01999	63.7269	1.45172e-14	3	2.00393e-12	0.72892	25	9.43836e-11	0.656596	499	0.454292	0.00951771
wue1_consensus4_model3	1	6.00739	5.3917	62.231	3.06702e-14	14	5.23497e-12	0.701202	26	1.03225e-10	0.653858	498	0.463277	0.00914813
wue1_consensus4_model4	1	5.31677	4.71537	62.7248	2.39593e-14	8	3.10748e-12	0.716255	29	1.34893e-10	0.645676	506	0.394214	0.0123097
wue1_consensus5_ensemble	1	6.17402	5.64067	62.651	2.48609e-14	8	3.10748e-12	0.716255	28	1.23405e-10	0.648397	488	0.558355	0.0058548
wue1_consensus5_model1	1	5.43705	4.9984	61.6956	4.00841e-14	15	5.70742e-12	0.698709	30	1.47424e-10	0.64296	502	0.427935	0.0106704
wue1_consensus5_model2	1	7.15083	6.06313	64.8684	8.20375e-15	1	1.67966e-12	0.734018	21	6.58502e-11	0.667608	531	0.221543	0.0252086
wue1_consensus5_model3	1	5.56671	5.05921	60.1743	8.5768e-14	27	1.59123e-11	0.669138	31	1.61091e-10	0.64025	508	0.377974	0.0131733
wue1_consensus5_model4	1	5.71289	5.18463	62.4038	2.81306e-14	8	3.10748e-12	0.716255	30	1.47424e-10	0.64296	486	0.578449	0.00528396
wue1_consensus6_ensemble	1	6.16711	5.58809	63.4177	1.69444e-14	6	2.6085e-12	0.721308	25	9.43836e-11	0.656596	505	0.40249	0.0118889
wue1_consensus6_model1	1	5.3881	4.90317	60.3862	7.71446e-14	25	1.34326e-11	0.674022	31	1.61091e-10	0.64025	505	0.40249	0.0118889
wue1_consensus6_model2	1	6.90241	6.1046	64.162	1.1679e-14	5	2.38938e-12	0.723841	20	6.01558e-11	0.670375	509	0.370011	0.0136161
wue1_consensus6_model3	1	6.6995	5.95496	61.8084	3.78852e-14	17	6.78107e-12	0.693736	27	1.12875e-10	0.651125	504	0.410869	0.0114754
wue1_consensus6_model4	1	5.70326	5.14782	63.476	1.64571e-14	4	2.18835e-12	0.726378	26	1.03225e-10	0.653858	498	0.463277	0.00914813
wue1_consensus7_ensemble	1	6.4413	5.78752	62.9973	2.0908e-14	5	2.38938e-12	0.723841	29	1.34893e-10	0.645676	497	0.472361	0.00878586
wue1_consensus7_model1	1	6.45307	5.78909	62.9395	2.15208e-14	7	2.84729e-12	0.718779	28	1.23405e-10	0.648397	504	0.410869	0.0114754
wue1_consensus7_model2	1	7.21694	6.31474	63.8861	1.34061e-14	3	2.00393e-12	0.72892	24	8.62837e-11	0.659341	503	0.419351	0.0110692
wue1_consensus7_model3	1	3.77662	3.57707	56.9746	4.24746e-13	51	1.16026e-10	0.611913	33	1.92238e-10	0.634847	497	0.472361	0.00878586
wue1_consensus7_model4	1	5.95562	5.37075	58.866	1.64969e-13	36	3.38554e-11	0.647379	32	1.75992e-10	0.637546	497	0.472361	0.00878586
wue1_consensus8_ensemble	1	7.02721	6.03348	63.7005	1.471e-14	4	2.18835e-12	0.726378	27	1.12875e-10	0.651125	524	0.263263	0.0211358
wue1_consensus8_model1	1	5.80387	5.14267	62.7011	2.42452e-14	9	3.39094e-12	0.713735	28	1.23405e-10	0.648397	505	0.40249	0.0118889
wue1_consensus8_model2	1	8.01377	6.84628	62.966	2.12373e-14	9	3.39094e-12	0.713735	27	1.12875e-10	0.651125	517	0.31011	0.0174217
wue1_consensus8_model3	1	6.1443	5.44199	62.7317	2.3877e-14	10	3.69971e-12	0.711219	29	1.34893e-10	0.645676	525	0.256992	0.0216957
wue1_consensus8_model4	1	7.8886	6.63845	64.0007	1.26596e-14	2	1.83478e-12	0.731467	24	8.62837e-11	0.659341	502	0.427935	0.0106704
wue1_consensus9_ensemble	1	7.84319	6.59545	63.8907	1.33756e-14	3	2.00393e-12	0.72892	27	1.12875e-10	0.651125	528	0.238804	0.0234192
wue1_consensus9_model1	1	6.42389	5.75626	62.5493	2.61571e-14	9	3.39094e-12	0.713735	30	1.47424e-10	0.64296	511	0.354401	0.0145236
wue1_consensus9_model2	1	6.58708	5.84953	63.0647	2.02147e-14	5	2.38938e-12	0.723841	29	1.34893e-10	0.645676	503	0.419351	0.0110692
wue1_consensus9_model3	1	7.6187	6.34229	64.3076	1.08588e-14	1	1.67966e-12	0.734018	26	1.03225e-10	0.653858	531	0.221543	0.0252086
wue1_consensus9_model4	1	9.46366	7.91214	64.491	9.90735e-15	1	1.67966e-12	0.734018	22	7.20707e-11	0.664847	513	0.339213	0.0154603
wue1_expert1_model1	1	20.3259	16.1702	60.27	8.17574e-14	23	9.61321e-12	0.678924	35	1.92843e-10	0.629467	499	0.454292	0.00951771
wue1_expert1_model2	1	19.63	16.113	59.4802	1.2135e-13	34	2.53112e-11	0.652183	30	1.28362e-10	0.64296	501	0.43662	0.0102788
wue1_expert1_model3	1	13.9744	12.0081	59.6021	1.14176e-13	28	1.64205e-11	0.666702	34	1.98328e-10	0.632154	491	0.528865	0.00676595
wue1_expert1_model4	1	12.2955	10.3528	60.9466	5.82915e-14	24	1.20333e-11	0.676471	29	1.31289e-10	0.645676	521	0.282706	0.0195001
wue1_expert2_model1	1	5.98965	5.23588	63.7054	1.46739e-14	5	2.38938e-12	0.723841	24	8.62837e-11	0.659341	509	0.370011	0.0136161
wue1_expert2_model2	1	6.17495	5.28703	63.845	1.36846e-14	5	2.38938e-12	0.723841	26	1.03225e-10	0.653858	534	0.205196	0.0270638
wue1_expert2_model3	1	7.20768	6.19225	62.728	2.39215e-14	10	3.69971e-12	0.711219	28	1.23405e-10	0.648397	517	0.31011	0.0174217
wue1_expert2_model4	1	6.00032	5.26489	63.9554	1.29498e-14	3	2.00393e-12	0.72892	26	1.03225e-10	0.653858	525	0.256992	0.0216957
wue1_expert3_model1	1	8.08344	6.83786	63.5296	1.60225e-14	15	5.70742e-12	0.698709	16	4.18196e-11	0.681502	523	0.269638	0.0205833
wue1_expert3_model2	1	5.66692	5.04179	59.4543	1.22929e-13	38	3.99748e-11	0.642592	26	1.03225e-10	0.653858	514	0.331778	0.0159397
wue1_expert3_model3	1	6.56111	5.61631	60.4556	7.45122e-14	31	2.22898e-11	0.659423	26	1.03225e-10	0.653858	526	0.250825	0.0222629
wue1_expert3_model4	1	3.76483	3.57043	56.522	5.32605e-13	55	1.60238e-10	0.602624	32	1.75992e-10	0.637546	480	0.64068	0.00374707
wue1_expert4_model1	1	10.2427	8.85804	60.2136	8.40989e-14	29	1.88303e-11	0.664271	28	1.23345e-10	0.648397	503	0.419351	0.0110692
wue1_expert4_model2	1	2.94234	2.8573	57.1597	3.87195e-13	45	7.11736e-11	0.625979	36	2.50269e-10	0.626786	452	0.95864	5.8548e-05
wue1_expert4_model3	1	3.48757	3.32592	55.3235	9.69716e-13	62	2.80324e-10	0.586539	37	2.73176e-10	0.62411	506	0.394214	0.0123097
wue1_expert4_model4	1	4.94536	4.65121	62.0428	3.36955e-14	12	4.40219e-12	0.706202	29	1.34893e-10	0.645676	488	0.558355	0.0058548
wue1_expert5_model1	1	6.66148	5.8231	63.6966	1.47386e-14	4	2.18835e-12	0.726378	26	1.03225e-10	0.653858	516	0.317226	0.0169204
wue1_expert5_model2	1	8.06287	6.85205	64.1631	1.16724e-14	4	2.18835e-12	0.726378	22	7.20707e-11	0.664847	517	0.31011	0.0174217
wue1_expert5_model3	1	8.96544	7.55274	60.7485	6.43629e-14	26	1.46146e-11	0.671578	28	1.23345e-10	0.648397	518	0.3031	0.0179303
wue1_expert5_model4	1	6.91414	6.09573	63.8117	1.39145e-14	6	2.6085e-12	0.721308	25	9.43836e-11	0.656596	533	0.210545	0.0264381

## Sheet: CA1-cFOS signal intensity
CA1-cFOS signal intensity	group mean (normalized to H)			Kruskal-Wallis ANOVA		Mann-Whitney-U-test: H vs. C-			Mann-Whitney-U-test: H vs. C+			Mann-Whitney-U-test: C- vs. C+
model/ensemble	H	C-	C+	H-statistic	p-value	U-statistic	p-value	eta^2	U-statistic	p-value	eta^2	U-statistic	p-value	eta^2
wue1_consensus1_ensemble	1	1.16752	1.15902	14.2583	0.000801416	293	0.000518467	0.177805	295	0.00477709	0.125003	495	0.490818	0.00808328
wue1_consensus1_model1	1	1.17923	1.17375	15.9354	0.000346481	277	0.00024482	0.198478	282	0.00272092	0.141037	494	0.50019	0.00774297
wue1_consensus1_model2	1	1.16648	1.15734	14.3685	0.000758434	290	0.000451676	0.181595	297	0.00519597	0.122622	497	0.472361	0.00878586
wue1_consensus1_model3	1	1.17679	1.16534	14.644	0.000660823	288	0.000411707	0.184143	294	0.00457933	0.126202	497	0.472361	0.00878586
wue1_consensus1_model4	1	1.16471	1.15584	15.2024	0.00049985	279	0.000269432	0.195832	294	0.00457933	0.126202	496	0.481541	0.00843091
wue1_consensus2_ensemble	1	1.16	1.15123	13.9113	0.000953222	294	0.000542703	0.176551	301	0.00613471	0.117929	496	0.481541	0.00843091
wue1_consensus2_model1	1	1.16069	1.14835	13.7281	0.00104467	295	0.000567992	0.175301	303	0.00665913	0.115616	494	0.50019	0.00774297
wue1_consensus2_model2	1	1.1805	1.17121	15.7846	0.000373608	275	0.000222329	0.201142	288	0.00354067	0.133516	497	0.472361	0.00878586
wue1_consensus2_model3	1	1.16471	1.15551	13.4628	0.00119286	298	0.000650594	0.171578	304	0.00693617	0.114469	491	0.528865	0.00676595
wue1_consensus2_model4	1	1.14896	1.14477	11.9927	0.00248778	301	0.00117534	0.157754	307	0.0115911	0.101704	489	0.548437	0.0061512
wue1_consensus3_ensemble	1	1.16331	1.15275	14.0353	0.000895926	294	0.000542703	0.176551	298	0.00541762	0.12144	494	0.50019	0.00774297
wue1_consensus3_model1	1	1.17636	1.16634	16.3776	0.000277748	269	0.000165941	0.209241	285	0.00310622	0.137251	500	0.445406	0.00989461
wue1_consensus3_model2	1	1.17375	1.16328	14.4598	0.000724592	287	0.000392985	0.185424	300	0.0058867	0.119093	501	0.43662	0.0102788
wue1_consensus3_model3	1	1.17181	1.15954	16.1125	0.00031711	271	0.000183042	0.206524	287	0.00339006	0.134756	498	0.463277	0.00914813
wue1_consensus3_model4	1	1.14583	1.13717	11.6464	0.00295813	315	0.00137085	0.151235	321	0.0135178	0.0958362	488	0.558355	0.0058548
wue1_consensus4_ensemble	1	1.16562	1.1558	14.6705	0.000652145	287	0.000392985	0.185424	294	0.00457933	0.126202	494	0.50019	0.00774297
wue1_consensus4_model1	1	1.17418	1.16575	15.6991	0.000389925	280	0.00028259	0.194515	283	0.00284421	0.139769	495	0.490818	0.00808328
wue1_consensus4_model2	1	1.15283	1.14507	12.6308	0.00180821	306	0.000928634	0.161845	312	0.00955233	0.105495	493	0.509656	0.00740998
wue1_consensus4_model3	1	1.16405	1.15342	14.7333	0.000631992	284	0.000341482	0.189294	296	0.00498255	0.12381	492	0.519215	0.00708431
wue1_consensus4_model4	1	1.18938	1.18054	16.6858	0.00023808	268	0.000157966	0.210607	280	0.00248886	0.14359	498	0.463277	0.00914813
wue1_consensus5_ensemble	1	1.15788	1.14793	13.9237	0.000947331	292	0.000495243	0.179064	303	0.00665913	0.115616	495	0.490818	0.00808328
wue1_consensus5_model1	1	1.14752	1.14341	12.8912	0.0015875	304	0.000850316	0.164251	308	0.00815076	0.109936	489	0.548437	0.0061512
wue1_consensus5_model2	1	1.18312	1.17539	15.3309	0.000468751	282	0.000310732	0.191896	289	0.00369733	0.132283	501	0.43662	0.0102788
wue1_consensus5_model3	1	1.16739	1.15888	15.6656	0.000396512	279	0.000269432	0.195832	283	0.00284421	0.139769	486	0.578449	0.00528396
wue1_consensus5_model4	1	1.17427	1.1659	15.9889	0.000337321	275	0.000222329	0.201142	283	0.00284421	0.139769	492	0.519215	0.00708431
wue1_consensus6_ensemble	1	1.16237	1.15237	14.0107	0.000907037	292	0.000495243	0.179064	302	0.00639208	0.11677	498	0.463277	0.00914813
wue1_consensus6_model1	1	1.16814	1.15733	15.5633	0.000417328	275	0.000222329	0.201142	292	0.00420588	0.128617	496	0.481541	0.00843091
wue1_consensus6_model2	1	1.16379	1.15374	13.5229	0.00115752	299	0.000680522	0.170345	302	0.00639208	0.11677	493	0.509656	0.00740998
wue1_consensus6_model3	1	1.16541	1.15647	14.4889	0.000714122	290	0.000451676	0.181595	293	0.00438901	0.127407	490	0.538606	0.00645492
wue1_consensus6_model4	1	1.16939	1.15939	14.1466	0.000847452	291	0.000472992	0.180327	299	0.00564777	0.120264	492	0.519215	0.00708431
wue1_consensus7_ensemble	1	1.15814	1.14896	13.6554	0.00108333	298	0.000650594	0.171578	301	0.00613471	0.117929	495	0.490818	0.00808328
wue1_consensus7_model1	1	1.1664	1.15533	14.6565	0.000656736	285	0.000357904	0.188	297	0.00519597	0.122622	495	0.490818	0.00808328
wue1_consensus7_model2	1	1.15643	1.15065	14.1914	0.000828675	292	0.000495243	0.179064	296	0.00498255	0.12381	488	0.558355	0.0058548
wue1_consensus7_model3	1	1.17458	1.16568	17.2908	0.00017593	262	0.000117195	0.218892	275	0.00198573	0.150072	492	0.519215	0.00708431
wue1_consensus7_model4	1	1.1631	1.15445	13.2994	0.00129443	304	0.000850316	0.164251	300	0.0058867	0.119093	491	0.528865	0.00676595
wue1_consensus8_ensemble	1	1.17043	1.16411	14.6471	0.000659829	287	0.000392985	0.185424	294	0.00457933	0.126202	492	0.519215	0.00708431
wue1_consensus8_model1	1	1.18914	1.17703	16.9438	0.000209272	264	0.000129532	0.216113	282	0.00272092	0.141037	505	0.40249	0.0118889
wue1_consensus8_model2	1	1.15224	1.14344	13.0015	0.00150229	300	0.000711727	0.169118	313	0.00993471	0.104398	498	0.463277	0.00914813
wue1_consensus8_model3	1	1.17756	1.16802	16.6063	0.000247733	269	0.000165941	0.209241	280	0.00248886	0.14359	497	0.472361	0.00878586
wue1_consensus8_model4	1	1.17512	1.17008	13.4963	0.00117307	300	0.000711727	0.169118	300	0.0058867	0.119093	487	0.568359	0.00556572
wue1_consensus9_ensemble	1	1.15279	1.14794	12.2961	0.0021376	312	0.00120548	0.154731	311	0.00918313	0.106596	490	0.538606	0.00645492
wue1_consensus9_model1	1	1.17365	1.16446	14.5337	0.000698294	289	0.000431259	0.182867	294	0.00457933	0.126202	493	0.509656	0.00740998
wue1_consensus9_model2	1	1.18128	1.17066	16.1019	0.000318805	275	0.000222329	0.201142	282	0.00272092	0.141037	497	0.472361	0.00878586
wue1_consensus9_model3	1	1.15073	1.14782	11.8064	0.00273066	317	0.00149246	0.148926	315	0.0107406	0.102224	488	0.558355	0.0058548
wue1_consensus9_model4	1	1.14645	1.1419	11.5795	0.0030587	317	0.00149246	0.148926	320	0.0130149	0.0968864	488	0.558355	0.0058548
wue1_expert1_model1	1	1.04836	1.05505	1.20704	0.546882	306	0.294003	0.0203487	280	0.43211	0.0123943	469	0.761313	0.00161373
wue1_expert1_model2	1	1.0575	1.06208	2.8852	0.236312	292	0.129789	0.0414317	260	0.165794	0.0374248	478	0.662029	0.00329333
wue1_expert1_model3	1	1.07827	1.07852	4.37143	0.112397	299	0.043808	0.0694013	287	0.127597	0.0426768	472	0.727683	0.00210773
wue1_expert1_model4	1	1.09024	1.09662	7.2033	0.0272786	300	0.0182144	0.0919601	265	0.0249149	0.0888711	474	0.705547	0.00247365
wue1_expert2_model1	1	1.19741	1.18804	16.1019	0.000318805	273	0.000201789	0.203824	284	0.00297258	0.138507	495	0.490818	0.00808328
wue1_expert2_model2	1	1.19776	1.19029	17.8915	0.00013029	258	9.57691e-05	0.224504	269	0.00150582	0.158039	491	0.528865	0.00676595
wue1_expert2_model3	1	1.18828	1.17629	15.6944	0.000390854	277	0.00024482	0.198478	287	0.00339006	0.134756	496	0.481541	0.00843091
wue1_expert2_model4	1	1.21099	1.20013	18.2486	0.000108984	255	8.21879e-05	0.22876	267	0.0013713	0.16074	494	0.50019	0.00774297
wue1_expert3_model1	1	1.15917	1.1494	10.4791	0.00530254	316	0.00223928	0.14001	322	0.0205106	0.0857143	489	0.548437	0.0061512
wue1_expert3_model2	1	1.16614	1.15502	13.2722	0.00131215	301	0.000744256	0.167894	304	0.00693617	0.114469	490	0.538606	0.00645492
wue1_expert3_model3	1	1.17341	1.16233	14.6587	0.000656004	288	0.000411707	0.184143	293	0.00438901	0.127407	494	0.50019	0.00774297
wue1_expert3_model4	1	1.15708	1.14427	12.8659	0.00160769	301	0.000744256	0.167894	312	0.00955233	0.105495	488	0.558355	0.0058548
wue1_expert4_model1	1	1.12869	1.12231	9.88091	0.00715135	318	0.00381283	0.127394	309	0.0185159	0.0900005	491	0.528865	0.00676595
wue1_expert4_model2	1	1.25317	1.2277	22.8306	1.10254e-05	218	1.12033e-05	0.284536	240	0.000362438	0.199451	510	0.362153	0.0140662
wue1_expert4_model3	1	1.17775	1.17008	17.4386	0.0001634	262	0.000117195	0.218892	273	0.00181204	0.152704	495	0.490818	0.00808328
wue1_expert4_model4	1	1.19152	1.17577	17.5826	0.000152051	261	0.00011145	0.220289	274	0.00189706	0.151385	505	0.40249	0.0118889
wue1_expert5_model1	1	1.18329	1.172	15.3823	0.00045685	278	0.00025685	0.197153	292	0.00420588	0.128617	497	0.472361	0.00878586
wue1_expert5_model2	1	1.16584	1.16046	15.211	0.000497718	270	0.000279144	0.197777	283	0.00428576	0.130129	499	0.454292	0.00951771
wue1_expert5_model3	1	1.13294	1.13122	10.7813	0.00455902	308	0.00251485	0.138918	301	0.0135758	0.0988299	491	0.528865	0.00676595
wue1_expert5_model4	1	1.183	1.17006	16.0345	0.000329723	273	0.000201789	0.203824	287	0.00339006	0.134756	502	0.427935	0.0106704

## Sheet: CA3-#cFOS+ nuclei
CA3-#cFOS+ nuclei	group mean (normalized to H)			Kruskal-Wallis ANOVA		Mann-Whitney-U-test: H vs. C-			Mann-Whitney-U-test: H vs. C+			Mann-Whitney-U-test: C- vs. C+
model/ensemble	H	C-	C+	H-statistic	p-value	U-statistic	p-value	eta^2	U-statistic	p-value	eta^2	U-statistic	p-value	eta^2
wue1_consensus1_ensemble	1	2.97624	2.42306	64.5605	9.56874e-15	8	6.84393e-12	0.714543	22	1.003e-10	0.66516	610	0.00772203	0.120972
wue1_consensus1_model1	1	2.83885	2.29109	62.0126	3.42087e-14	14	1.17065e-11	0.698591	38	4.23297e-10	0.620457	608	0.00844777	0.118238
wue1_consensus1_model2	1	3.07468	2.56657	65.4644	6.0895e-15	4	4.76962e-12	0.725277	11	3.62489e-11	0.696796	583	0.0241871	0.0867023
wue1_consensus1_model3	1	2.70402	2.26948	65.0797	7.38105e-15	10	8.19019e-12	0.709205	7	2.48957e-11	0.708482	583	0.0241871	0.0867023
wue1_consensus1_model4	1	2.84293	2.30165	63.6225	1.52951e-14	11	8.95741e-12	0.706544	28	1.73078e-10	0.648214	613	0.00673794	0.125131
wue1_consensus2_ensemble	1	3.15321	2.60565	65.7041	5.40164e-15	5	5.2215e-12	0.722586	11	3.62489e-11	0.696796	596	0.0142272	0.102492
wue1_consensus2_model1	1	3.04959	2.46434	65.0109	7.63931e-15	8	6.84393e-12	0.714543	19	7.61603e-11	0.673715	614	0.00643588	0.126533
wue1_consensus2_model2	1	2.82168	2.36727	63.1849	1.90357e-14	10	8.19019e-12	0.709205	25	1.31867e-10	0.65666	585	0.022342	0.0890455
wue1_consensus2_model3	1	2.76673	2.28589	63.7476	1.43675e-14	14	1.17065e-11	0.698591	20	8.34962e-11	0.670858	604	0.0100847	0.112864
wue1_consensus2_model4	1	3.42547	2.7953	65.5261	5.90446e-15	3	4.35615e-12	0.727974	13	4.3691e-11	0.690989	588	0.019804	0.0926189
wue1_consensus3_ensemble	1	3.21936	2.63226	66.121	4.38543e-15	3	4.35615e-12	0.727974	10	3.30084e-11	0.699708	597	0.0136381	0.103761
wue1_consensus3_model1	1	3.1341	2.52167	64.9433	7.90217e-15	4	4.76962e-12	0.725277	23	1.09899e-10	0.662321	608	0.00844777	0.118238
wue1_consensus3_model2	1	3.26627	2.66907	65.1358	7.17704e-15	4	4.76962e-12	0.725277	14	4.79533e-11	0.688095	583	0.0241871	0.0867023
wue1_consensus3_model3	1	2.92189	2.37519	64.0717	1.22184e-14	7	6.25469e-12	0.717219	29	1.8943e-10	0.645411	613	0.00673794	0.125131
wue1_consensus3_model4	1	3.38441	2.80652	66.543	3.55117e-15	2	3.97788e-12	0.730675	5	2.06087e-11	0.714362	588	0.019804	0.0926189
wue1_consensus4_ensemble	1	3.12674	2.57043	64.8572	8.24985e-15	7	6.25469e-12	0.717219	16	5.77333e-11	0.682325	595	0.0148385	0.10123
wue1_consensus4_model1	1	3.26211	2.61833	65.202	6.94343e-15	5	5.2215e-12	0.722586	18	6.9456e-11	0.676579	604	0.0100847	0.112864
wue1_consensus4_model2	1	3.05602	2.52126	64.8418	8.31338e-15	6	5.71525e-12	0.7199	18	6.9456e-11	0.676579	597	0.0136381	0.103761
wue1_consensus4_model3	1	3.06775	2.52006	63.6845	1.48285e-14	12	9.79492e-12	0.703888	22	1.003e-10	0.66516	600	0.0119983	0.107615
wue1_consensus4_model4	1	2.78669	2.35851	66.2949	4.02017e-15	3	4.35615e-12	0.727974	11	3.62489e-11	0.696796	606	0.00923391	0.115535
wue1_consensus5_ensemble	1	3.11743	2.53056	64.8719	8.18943e-15	8	6.84393e-12	0.714543	20	8.34962e-11	0.670858	613	0.00673794	0.125131
wue1_consensus5_model1	1	2.90479	2.29544	63.236	1.8556e-14	9	7.48746e-12	0.711872	38	4.23297e-10	0.620457	623	0.0042188	0.139502
wue1_consensus5_model2	1	3.3383	2.74228	66.0607	4.51964e-15	2	3.97788e-12	0.730675	5	2.06087e-11	0.714362	570	0.0397044	0.0722331
wue1_consensus5_model3	1	2.95296	2.40222	62.8006	2.30692e-14	12	9.79492e-12	0.703888	32	2.48073e-10	0.637038	605	0.00965095	0.114196
wue1_consensus5_model4	1	2.87687	2.38905	64.4744	9.99007e-15	7	6.25469e-12	0.717219	19	7.61603e-11	0.673715	593	0.016131	0.0987308
wue1_consensus6_ensemble	1	3.14605	2.54922	65.989	4.68453e-15	6	5.71525e-12	0.7199	14	4.79533e-11	0.688095	619	0.00510073	0.13366
wue1_consensus6_model1	1	3.04698	2.41372	63.7804	1.41342e-14	9	7.48746e-12	0.711872	36	3.54499e-10	0.62596	632	0.00271815	0.153105
wue1_consensus6_model2	1	3.20688	2.6473	65.7684	5.23083e-15	7	6.25469e-12	0.717219	6	2.26531e-11	0.711419	589	0.0190158	0.0938257
wue1_consensus6_model3	1	3.1435	2.48542	64.5257	9.73713e-15	9	7.48746e-12	0.711872	29	1.8943e-10	0.645411	633	0.00258581	0.154655
wue1_consensus6_model4	1	2.84984	2.38874	66.3528	3.90554e-15	5	5.2215e-12	0.722586	7	2.48957e-11	0.708482	603	0.0105357	0.11154
wue1_consensus7_ensemble	1	3.16523	2.55591	65.4635	6.09231e-15	7	6.25469e-12	0.717219	17	6.33299e-11	0.679449	617	0.00560143	0.130786
wue1_consensus7_model1	1	3.08194	2.52378	66.6228	3.41223e-15	2	3.97788e-12	0.730675	13	4.3691e-11	0.690989	618	0.00534579	0.132219
wue1_consensus7_model2	1	3.37342	2.80079	66.5359	3.56379e-15	1	3.63186e-12	0.733381	2	1.54999e-11	0.723226	570	0.0397044	0.0722331
wue1_consensus7_model3	1	2.46572	1.91643	51.9518	5.23374e-12	47	2.02015e-10	0.614073	98	6.11995e-08	0.466667	608	0.00844777	0.118238
wue1_consensus7_model4	1	3.20599	2.55645	62.6972	2.42928e-14	12	9.79492e-12	0.703888	33	2.71306e-10	0.63426	605	0.00965095	0.114196
wue1_consensus8_ensemble	1	3.27711	2.63768	65.8429	5.03953e-15	2	3.97788e-12	0.730675	13	4.3691e-11	0.690989	594	0.0154729	0.0999766
wue1_consensus8_model1	1	2.97947	2.44505	64.9672	7.80814e-15	9	7.48746e-12	0.711872	15	5.26215e-11	0.685207	604	0.0100847	0.112864
wue1_consensus8_model2	1	3.42527	2.7471	65.2108	6.91293e-15	3	4.35615e-12	0.727974	17	6.33299e-11	0.679449	592	0.0168136	0.0974928
wue1_consensus8_model3	1	3.09677	2.49835	64.4556	1.00841e-14	5	5.2215e-12	0.722586	26	1.44406e-10	0.653839	607	0.00883303	0.116883
wue1_consensus8_model4	1	3.19728	2.64551	65.0913	7.33835e-15	6	5.71525e-12	0.7199	9	3.0052e-11	0.702627	571	0.0382663	0.0732992
wue1_consensus9_ensemble	1	3.37689	2.70782	65.8575	5.00291e-15	2	3.97788e-12	0.730675	14	4.79533e-11	0.688095	598	0.0130708	0.105038
wue1_consensus9_model1	1	3.01312	2.48218	65.3328	6.50366e-15	2	3.97788e-12	0.730675	21	9.15216e-11	0.668006	605	0.00965095	0.114196
wue1_consensus9_model2	1	3.09612	2.53924	64.8453	8.29895e-15	7	6.25469e-12	0.717219	15	5.26215e-11	0.685207	591	0.0175214	0.0962626
wue1_consensus9_model3	1	3.38585	2.70973	65.876	4.95697e-15	1	3.63186e-12	0.733381	16	5.77333e-11	0.682325	601	0.0114919	0.108916
wue1_consensus9_model4	1	3.40337	2.85007	65.1029	7.29591e-15	1	3.63186e-12	0.733381	13	4.3691e-11	0.690989	562	0.0529442	0.063985
wue1_expert1_model1	1	6.03373	4.19683	60.91	5.93679e-14	18	1.6657e-11	0.688056	46	8.52538e-10	0.598688	615	0.00614607	0.127943
wue1_expert1_model2	1	6.05184	4.21715	62.1948	3.12295e-14	15	1.27698e-11	0.695949	44	7.16103e-10	0.604094	633	0.00258581	0.154655
wue1_expert1_model3	1	5.7194	4.12809	61.5764	4.2545e-14	18	1.6657e-11	0.688056	39	4.6154e-10	0.617714	614	0.00643588	0.126533
wue1_expert1_model4	1	4.8897	3.45826	63.1822	1.90615e-14	17	1.5277e-11	0.690682	28	1.73078e-10	0.648214	624	0.00402112	0.140983
wue1_expert2_model1	1	2.97428	2.48308	64.9297	7.95603e-15	4	4.76962e-12	0.725277	12	3.98001e-11	0.69389	567	0.0442966	0.0690815
wue1_expert2_model2	1	3.11058	2.61458	65.6844	5.45529e-15	2	3.97788e-12	0.730675	11	3.62489e-11	0.696796	581	0.0261629	0.0843904
wue1_expert2_model3	1	3.23071	2.67006	65.9201	4.84868e-15	3	4.35615e-12	0.727974	13	4.3691e-11	0.690989	601	0.0114919	0.108916
wue1_expert2_model4	1	2.914	2.47638	66.2235	4.1663e-15	0	3.31541e-12	0.736092	6	2.26531e-11	0.711419	570	0.0397044	0.0722331
wue1_expert3_model1	1	3.50266	2.77898	66.0987	4.43453e-15	1	3.63186e-12	0.733381	21	9.15216e-11	0.668006	623	0.0042188	0.139502
wue1_expert3_model2	1	3.05431	2.32789	64.6773	9.02609e-15	4	4.76962e-12	0.725277	36	3.54499e-10	0.62596	637	0.00211328	0.160935
wue1_expert3_model3	1	3.34384	2.5642	65.4188	6.22988e-15	6	5.71525e-12	0.7199	24	1.20394e-10	0.659487	632	0.00271815	0.153105
wue1_expert3_model4	1	2.52344	1.94375	49.8727	1.48009e-11	51	2.81918e-10	0.604199	107	1.21801e-07	0.445484	586	0.0214662	0.0902289
wue1_expert4_model1	1	3.99459	3.11668	65.3328	6.50366e-15	6	5.71525e-12	0.7199	17	6.33299e-11	0.679449	609	0.00807761	0.119601
wue1_expert4_model2	1	2.2966	1.76383	50.7369	9.60781e-12	49	2.38723e-10	0.609126	98	6.11995e-08	0.466667	580	0.0272021	0.0832461
wue1_expert4_model3	1	2.78001	2.09635	49.6054	1.69168e-11	49	2.38723e-10	0.609126	124	4.2898e-07	0.406815	612	0.00705267	0.123737
wue1_expert4_model4	1	2.89134	2.42677	62.877	2.22044e-14	8	6.84393e-12	0.714543	26	1.44406e-10	0.653839	568	0.0427184	0.0701242
wue1_expert5_model1	1	3.30641	2.75911	65.5018	5.97672e-15	4	4.76962e-12	0.725277	4	1.87453e-11	0.71731	553	0.0720565	0.0553034
wue1_expert5_model2	1	3.36937	2.81357	65.1389	7.16575e-15	2	3.97788e-12	0.730675	9	3.0052e-11	0.702627	550	0.0795638	0.0525502
wue1_expert5_model3	1	3.85876	3.02876	65.8833	4.9389e-15	5	5.2215e-12	0.722586	17	6.33299e-11	0.679449	621	0.00464083	0.136566
wue1_expert5_model4	1	3.11663	2.57318	66.0906	4.45256e-15	3	4.35615e-12	0.727974	10	3.30084e-11	0.699708	596	0.0142272	0.102492

## Sheet: CA3-cFOS signal intensity
CA3-cFOS signal intensity	group mean (normalized to H)			Kruskal-Wallis ANOVA		Mann-Whitney-U-test: H vs. C-			Mann-Whitney-U-test: H vs. C+			Mann-Whitney-U-test: C- vs. C+
model/ensemble	H	C-	C+	H-statistic	p-value	U-statistic	p-value	eta^2	U-statistic	p-value	eta^2	U-statistic	p-value	eta^2
wue1_consensus1_ensemble	1	1.36505	1.16852	24.0897	5.87462e-06	165	1.27426e-06	0.356424	322	0.0205106	0.0857143	597	0.0136381	0.103761
wue1_consensus1_model1	1	1.35357	1.16364	24.1786	5.61942e-06	166	1.35931e-06	0.354538	320	0.0190507	0.0877672	599	0.0125244	0.106323
wue1_consensus1_model2	1	1.38232	1.17124	24.9898	3.74578e-06	161	9.82458e-07	0.364017	317	0.0170312	0.0908922	604	0.0100847	0.112864
wue1_consensus1_model3	1	1.36646	1.1721	23.9057	6.44091e-06	168	1.5461e-06	0.350781	319	0.0183554	0.0888028	596	0.0142272	0.102492
wue1_consensus1_model4	1	1.36314	1.16552	24.8619	3.99299e-06	157	7.5555e-07	0.371691	324	0.0220672	0.0836856	600	0.0119983	0.107615
wue1_consensus2_ensemble	1	1.36048	1.1598	22.9587	1.03414e-05	176	2.57123e-06	0.335955	326	0.0237255	0.0816812	597	0.0136381	0.103761
wue1_consensus2_model1	1	1.36237	1.16654	24.3239	5.22551e-06	164	1.19433e-06	0.358315	323	0.0212765	0.0846969	601	0.0114919	0.108916
wue1_consensus2_model2	1	1.37008	1.17001	24.4823	4.8276e-06	163	1.11924e-06	0.36021	317	0.0170312	0.0908922	597	0.0136381	0.103761
wue1_consensus2_model3	1	1.35104	1.15973	23.7294	7.03445e-06	169	1.64851e-06	0.34891	329	0.0264154	0.0787202	603	0.0105357	0.11154
wue1_consensus2_model4	1	1.3696	1.16281	22.2176	1.49797e-05	186	4.78688e-06	0.317872	322	0.0205106	0.0857143	596	0.0142272	0.102492
wue1_consensus3_ensemble	1	1.3666	1.16531	23.7361	7.01101e-06	170	1.75743e-06	0.347045	321	0.0197689	0.0867377	598	0.0130708	0.105038
wue1_consensus3_model1	1	1.37686	1.17336	24.8049	4.10842e-06	165	1.27426e-06	0.356424	314	0.015202	0.0940719	605	0.00965095	0.114196
wue1_consensus3_model2	1	1.36671	1.16375	23.2655	8.87066e-06	175	2.41418e-06	0.337791	324	0.0220672	0.0836856	600	0.0119983	0.107615
wue1_consensus3_model3	1	1.36086	1.17156	24.5662	4.62925e-06	164	1.19433e-06	0.358315	312	0.0140808	0.0962221	596	0.0142272	0.102492
wue1_consensus3_model4	1	1.36311	1.15841	21.8935	1.76149e-05	190	6.11061e-06	0.310779	332	0.0293649	0.0758139	605	0.00965095	0.114196
wue1_consensus4_ensemble	1	1.35729	1.15929	22.8633	1.08467e-05	178	2.91525e-06	0.332298	323	0.0212765	0.0846969	596	0.0142272	0.102492
wue1_consensus4_model1	1	1.35621	1.16297	24.587	4.58135e-06	167	1.44982e-06	0.352657	316	0.0164011	0.0919461	606	0.00923391	0.115535
wue1_consensus4_model2	1	1.35693	1.16406	22.6398	1.21294e-05	181	3.51528e-06	0.326851	320	0.0190507	0.0877672	594	0.0154729	0.0999766
wue1_consensus4_model3	1	1.35225	1.15932	23.875	6.54056e-06	167	1.44982e-06	0.352657	324	0.0220672	0.0836856	598	0.0130708	0.105038
wue1_consensus4_model4	1	1.3838	1.17727	24.5979	4.55652e-06	161	9.82458e-07	0.364017	324	0.0220672	0.0836856	602	0.0110046	0.110224
wue1_consensus5_ensemble	1	1.35502	1.16471	24.1362	5.7397e-06	166	1.35931e-06	0.354538	321	0.0197689	0.0867377	599	0.0125244	0.106323
wue1_consensus5_model1	1	1.31387	1.15029	22.1406	1.55678e-05	184	4.23275e-06	0.321448	327	0.0245945	0.0806882	595	0.0148385	0.10123
wue1_consensus5_model2	1	1.38623	1.17831	23.6941	7.15971e-06	171	1.87325e-06	0.345184	321	0.0197689	0.0867377	599	0.0125244	0.106323
wue1_consensus5_model3	1	1.35755	1.15821	23.6624	7.27405e-06	173	2.12726e-06	0.341477	322	0.0205106	0.0857143	603	0.0105357	0.11154
wue1_consensus5_model4	1	1.3626	1.16801	24.9947	3.73655e-06	162	1.04871e-06	0.362111	317	0.0170312	0.0908922	606	0.00923391	0.115535
wue1_consensus6_ensemble	1	1.3642	1.16625	23.4767	7.98165e-06	174	2.26636e-06	0.339631	321	0.0197689	0.0867377	600	0.0119983	0.107615
wue1_consensus6_model1	1	1.34647	1.16185	24.4823	4.8276e-06	163	1.11924e-06	0.36021	317	0.0170312	0.0908922	597	0.0136381	0.103761
wue1_consensus6_model2	1	1.37822	1.17297	22.9996	1.0132e-05	176	2.57123e-06	0.335955	325	0.0228833	0.0826804	597	0.0136381	0.103761
wue1_consensus6_model3	1	1.35085	1.16233	23.5184	7.81716e-06	170	1.75743e-06	0.347045	324	0.0220672	0.0836856	596	0.0142272	0.102492
wue1_consensus6_model4	1	1.37799	1.17263	23.4353	8.1489e-06	174	2.26636e-06	0.339631	322	0.0205106	0.0857143	600	0.0119983	0.107615
wue1_consensus7_ensemble	1	1.36071	1.1639	22.9996	1.0132e-05	175	2.41418e-06	0.337791	326	0.0237255	0.0816812	596	0.0142272	0.102492
wue1_consensus7_model1	1	1.3738	1.1683	23.8445	6.64086e-06	170	1.75743e-06	0.347045	324	0.0220672	0.0836856	603	0.0105357	0.11154
wue1_consensus7_model2	1	1.35995	1.15639	21.3589	2.30135e-05	197	9.31083e-06	0.298558	327	0.0245945	0.0806882	602	0.0110046	0.110224
wue1_consensus7_model3	1	1.34883	1.16832	24.5784	4.60128e-06	162	1.04871e-06	0.362111	319	0.0183554	0.0888028	599	0.0125244	0.106323
wue1_consensus7_model4	1	1.33564	1.15266	22.7781	1.13186e-05	174	2.26636e-06	0.339631	336	0.033735	0.0720238	598	0.0130708	0.105038
wue1_consensus8_ensemble	1	1.36089	1.16753	24.2676	5.37486e-06	169	1.64851e-06	0.34891	316	0.0164011	0.0919461	603	0.0105357	0.11154
wue1_consensus8_model1	1	1.37919	1.1748	24.6722	4.39047e-06	162	1.04871e-06	0.362111	319	0.0183554	0.0888028	601	0.0114919	0.108916
wue1_consensus8_model2	1	1.35158	1.16268	23.394	8.31893e-06	175	2.41418e-06	0.337791	322	0.0205106	0.0857143	601	0.0114919	0.108916
wue1_consensus8_model3	1	1.35806	1.16527	25.1626	3.43564e-06	161	9.82458e-07	0.364017	313	0.014632	0.095144	604	0.0100847	0.112864
wue1_consensus8_model4	1	1.36891	1.16989	23.6213	7.42504e-06	176	2.57123e-06	0.335955	320	0.0190507	0.0877672	606	0.00923391	0.115535
wue1_consensus9_ensemble	1	1.3515	1.16023	22.7857	1.12756e-05	179	3.10341e-06	0.330477	325	0.0228833	0.0826804	598	0.0130708	0.105038
wue1_consensus9_model1	1	1.37355	1.17548	25.2063	3.36148e-06	161	9.82458e-07	0.364017	312	0.0140808	0.0962221	604	0.0100847	0.112864
wue1_consensus9_model2	1	1.36986	1.17136	25.341	3.14246e-06	158	8.07012e-07	0.369765	313	0.014632	0.095144	602	0.0110046	0.110224
wue1_consensus9_model3	1	1.34217	1.15371	21.6405	1.99904e-05	191	6.49263e-06	0.309018	334	0.031485	0.0739067	603	0.0105357	0.11154
wue1_consensus9_model4	1	1.36035	1.15669	21.3204	2.34606e-05	190	6.11061e-06	0.310779	335	0.0325934	0.0729622	595	0.0148385	0.10123
wue1_expert1_model1	1	1.22807	1.06321	15.6031	0.000409092	215	0.000115088	0.236898	380	0.317226	0.0169204	608	0.00844777	0.118238
wue1_expert1_model2	1	1.23076	1.06724	16.3483	0.000281846	206	6.88879e-05	0.252316	374	0.276119	0.0200381	607	0.00883303	0.116883
wue1_expert1_model3	1	1.22806	1.07272	16.3504	0.000281546	206	6.88879e-05	0.252316	363	0.210545	0.0264381	602	0.0110046	0.110224
wue1_expert1_model4	1	1.27865	1.11289	19.3338	6.33473e-05	191	1.05069e-05	0.299614	360	0.102313	0.0434238	596	0.0142272	0.102492
wue1_expert2_model1	1	1.41248	1.18857	24.1515	5.69586e-06	166	1.35931e-06	0.354538	324	0.0220672	0.0836856	602	0.0110046	0.110224
wue1_expert2_model2	1	1.39557	1.17978	25.214	3.34853e-06	165	1.27426e-06	0.356424	310	0.0130333	0.0983965	610	0.00772203	0.120972
wue1_expert2_model3	1	1.39232	1.17923	24.9423	3.83568e-06	163	1.11924e-06	0.36021	315	0.0157915	0.093006	605	0.00965095	0.114196
wue1_expert2_model4	1	1.41173	1.19349	25.6984	2.62826e-06	161	9.82458e-07	0.364017	302	0.00950002	0.107337	605	0.00965095	0.114196
wue1_expert3_model1	1	1.37133	1.16404	19.5451	5.69944e-05	208	1.77662e-05	0.27985	342	0.0413272	0.0665209	594	0.0154729	0.0999766
wue1_expert3_model2	1	1.3276	1.14578	21.2146	2.47349e-05	192	6.89743e-06	0.307262	330	0.0273688	0.0777454	592	0.0168136	0.0974928
wue1_expert3_model3	1	1.33645	1.14779	19.1258	7.0289e-05	208	1.77662e-05	0.27985	344	0.0441601	0.0647352	586	0.0214662	0.0902289
wue1_expert3_model4	1	1.30687	1.13869	21.9308	1.72899e-05	188	5.41012e-06	0.314315	326	0.0237255	0.0816812	597	0.0136381	0.103761
wue1_expert4_model1	1	1.30983	1.12921	19.9945	4.55255e-05	200	1.11261e-05	0.293396	350	0.0536594	0.0595238	596	0.0142272	0.102492
wue1_expert4_model2	1	1.39862	1.21645	30.0023	3.05552e-07	128	1.04278e-07	0.429716	268	0.0021854	0.149672	593	0.016131	0.0987308
wue1_expert4_model3	1	1.28533	1.13994	24.4859	4.81902e-06	165	1.27426e-06	0.356424	304	0.0102923	0.105066	588	0.019804	0.0926189
wue1_expert4_model4	1	1.38071	1.17916	25.6622	2.67626e-06	151	5.07116e-07	0.383351	317	0.0170312	0.0908922	599	0.0125244	0.106323
wue1_expert5_model1	1	1.39315	1.17376	23.9137	6.41521e-06	169	1.64851e-06	0.34891	328	0.0254909	0.0797012	606	0.00923391	0.115535
wue1_expert5_model2	1	1.41361	1.18395	22.5275	1.28294e-05	182	3.74038e-06	0.325045	325	0.0228833	0.0826804	598	0.0130708	0.105038
wue1_expert5_model3	1	1.33236	1.14218	20.4583	3.61016e-05	194	7.78063e-06	0.303765	352	0.0571827	0.0578353	597	0.0136381	0.103761
wue1_expert5_model4	1	1.40587	1.19162	24.4326	4.94908e-06	166	1.35931e-06	0.354538	312	0.0140808	0.0962221	597	0.0136381	0.103761

## Sheet: DG-#cFOS+ nuclei
DG-#cFOS+ nuclei	group mean (normalized to H)			Kruskal-Wallis ANOVA		Mann-Whitney-U-test: H vs. C-			Mann-Whitney-U-test: H vs. C+			Mann-Whitney-U-test: C- vs. C+
model/ensemble	H	C-	C+	H-statistic	p-value	U-statistic	p-value	eta^2	U-statistic	p-value	eta^2	U-statistic	p-value	eta^2
wue1_consensus1_ensemble	1	1.17394	1.28956	11.1701	0.00375349	369	0.0262348	0.075289	248	0.00147181	0.163851	345	0.25514	0.0226334
wue1_consensus1_model1	1	1.1748	1.29845	11.4581	0.00325011	366	0.023743	0.0779152	246	0.00133392	0.166784	343	0.242351	0.0238819
wue1_consensus1_model2	1	1.19049	1.30348	12.2941	0.00213982	341	0.00980974	0.101551	249	0.00154557	0.162395	345	0.25514	0.0226334
wue1_consensus1_model3	1	1.18241	1.30124	12.1515	0.00229787	354	0.0157162	0.0888701	241	0.00103967	0.174228	349	0.282106	0.020237
wue1_consensus1_model4	1	1.17207	1.28265	10.4066	0.00549835	368	0.0253802	0.0761594	259	0.00249443	0.148188	352	0.303557	0.0185276
wue1_consensus2_ensemble	1	1.1894	1.3095	12.5119	0.00191897	356	0.0168601	0.0869942	235	0.000766131	0.183377	346	0.261707	0.0220217
wue1_consensus2_model1	1	1.18321	1.30967	12.8547	0.00161672	361	0.0200451	0.0823922	230	0.000590946	0.191179	336	0.201161	0.0285157
wue1_consensus2_model2	1	1.18453	1.29803	12.6283	0.00181054	343	0.0105649	0.0995448	243	0.0011493	0.171231	343	0.242351	0.0238819
wue1_consensus2_model3	1	1.16208	1.29482	11.4885	0.00320119	382	0.0398121	0.0644292	241	0.00103967	0.174228	329	0.165329	0.03356
wue1_consensus2_model4	1	1.2167	1.30657	12.1938	0.00224984	331	0.00670916	0.11188	253	0.00187595	0.156634	364	0.399914	0.0124443
wue1_consensus3_ensemble	1	1.19441	1.29876	12.2358	0.00220311	341	0.00980974	0.101551	246	0.00133392	0.166784	359	0.357721	0.0148323
wue1_consensus3_model1	1	1.17603	1.29417	11.3363	0.00345429	358	0.0180765	0.0851384	251	0.00170341	0.159501	350	0.289139	0.0196588
wue1_consensus3_model2	1	1.20817	1.32195	13.5064	0.00116714	332	0.0069737	0.110825	235	0.000766131	0.183377	351	0.296289	0.019089
wue1_consensus3_model3	1	1.19632	1.30428	12.4651	0.00196442	340	0.00945048	0.102561	245	0.00126954	0.16826	352	0.303557	0.0185276
wue1_consensus3_model4	1	1.20295	1.30545	11.7093	0.00286652	340	0.00945048	0.102561	255	0.00206442	0.153793	360	0.365928	0.014338
wue1_consensus4_ensemble	1	1.1885	1.30575	11.373	0.00339148	361	0.0200451	0.0823922	249	0.00154557	0.162395	348	0.27519	0.0208235
wue1_consensus4_model1	1	1.1876	1.30674	11.7679	0.00278383	361	0.0200451	0.0823922	242	0.00109322	0.172727	350	0.289139	0.0196588
wue1_consensus4_model2	1	1.21127	1.3151	12.6929	0.00175296	323	0.00489703	0.120504	253	0.00187595	0.156634	356	0.333803	0.0163657
wue1_consensus4_model3	1	1.18751	1.30574	12.0853	0.00237532	361	0.0200451	0.0823922	236	0.000806505	0.181836	353	0.310942	0.0179746
wue1_consensus4_model4	1	1.17981	1.30327	12.3067	0.00212638	352	0.0146411	0.0907659	247	0.0014013	0.165314	328	0.16063	0.0343141
wue1_consensus5_ensemble	1	1.18385	1.29944	11.8937	0.00261413	356	0.0168601	0.0869942	245	0.00126954	0.16826	345	0.25514	0.0226334
wue1_consensus5_model1	1	1.17197	1.30536	11.792	0.00275042	377	0.0340116	0.068506	240	0.000988556	0.175737	327	0.156032	0.0350766
wue1_consensus5_model2	1	1.1906	1.2926	11.9409	0.00255315	336	0.00812802	0.106653	256	0.00216503	0.152382	353	0.310942	0.0179746
wue1_consensus5_model3	1	1.17042	1.28647	10.5679	0.00507224	363	0.0214592	0.0805864	260	0.00261404	0.146803	351	0.296289	0.019089
wue1_consensus5_model4	1	1.18076	1.29219	12.1047	0.00235233	352	0.0146411	0.0907659	246	0.00133392	0.166784	340	0.224024	0.0258176
wue1_consensus6_ensemble	1	1.19169	1.30079	11.828	0.00270132	349	0.01315	0.0936472	249	0.00154557	0.162395	351	0.296289	0.019089
wue1_consensus6_model1	1	1.18276	1.29069	10.6649	0.00483211	367	0.0245498	0.0770348	255	0.00206442	0.153793	353	0.310942	0.0179746
wue1_consensus6_model2	1	1.20326	1.30773	12.1249	0.00232874	337	0.0084421	0.105622	251	0.00170341	0.159501	358	0.349631	0.0153351
wue1_consensus6_model3	1	1.18359	1.30559	11.1819	0.00373157	359	0.018713	0.084218	251	0.00170341	0.159501	356	0.333803	0.0163657
wue1_consensus6_model4	1	1.17254	1.31126	13.7085	0.00105497	355	0.0162794	0.0879296	226	0.000478476	0.197538	323	0.138633	0.0382105
wue1_consensus7_ensemble	1	1.18505	1.30313	11.6352	0.00297473	350	0.0136314	0.0926818	252	0.00178777	0.158065	349	0.282106	0.020237
wue1_consensus7_model1	1	1.19439	1.29164	12.0486	0.00241921	343	0.0105649	0.0995448	247	0.0014013	0.165314	361	0.374251	0.013852
wue1_consensus7_model2	1	1.20552	1.31365	12.962	0.00153224	322	0.00470482	0.121605	250	0.00162272	0.160945	354	0.318445	0.0174299
wue1_consensus7_model3	1	1.16235	1.29101	9.83393	0.0073213	386	0.0450378	0.0612578	258	0.00237986	0.149579	349	0.282106	0.020237
wue1_consensus7_model4	1	1.17527	1.29132	10.3911	0.00554116	364	0.0221982	0.079691	262	0.00286911	0.144053	352	0.303557	0.0185276
wue1_consensus8_ensemble	1	1.18876	1.30372	12.3635	0.00206684	355	0.0162794	0.0879296	237	0.000848846	0.180301	349	0.282106	0.020237
wue1_consensus8_model1	1	1.18141	1.3107	11.8285	0.00270065	367	0.0245498	0.0770348	242	0.00109322	0.172727	336	0.201161	0.0285157
wue1_consensus8_model2	1	1.19196	1.2972	12.471	0.00195864	338	0.00876699	0.104597	245	0.00126954	0.16826	357	0.341659	0.0158462
wue1_consensus8_model3	1	1.18001	1.283	10.1032	0.00639914	360	0.019369	0.0833026	268	0.00377663	0.135958	358	0.349631	0.0153351
wue1_consensus8_model4	1	1.20165	1.3297	14.649	0.000659185	337	0.0084421	0.105622	220	0.000346619	0.207272	334	0.19039	0.029915
wue1_consensus9_ensemble	1	1.20758	1.31513	13.2192	0.00134736	326	0.00551701	0.117233	242	0.00109322	0.172727	358	0.349631	0.0153351
wue1_consensus9_model1	1	1.17719	1.29982	11.5831	0.00305321	367	0.0245498	0.0770348	243	0.0011493	0.171231	344	0.248688	0.0232535
wue1_consensus9_model2	1	1.1883	1.3081	11.6459	0.00295887	365	0.0229593	0.0788006	244	0.00120804	0.169742	342	0.236128	0.0245188
wue1_consensus9_model3	1	1.1931	1.29709	11.5279	0.00313875	346	0.0117948	0.0965735	253	0.00187595	0.156634	362	0.38269	0.0133743
wue1_consensus9_model4	1	1.22509	1.31183	12.3568	0.00207376	327	0.0057389	0.116152	252	0.00178777	0.158065	371	0.463769	0.00945286
wue1_expert1_model1	1	1.30543	1.35466	12.3546	0.00207602	303	0.00213563	0.143464	269	0.00395106	0.134631	404	0.827244	0.00088087
wue1_expert1_model2	1	1.3002	1.36115	13.4605	0.00119422	298	0.00171894	0.149517	255	0.00206442	0.153793	401	0.791007	0.00128307
wue1_expert1_model3	1	1.33426	1.39383	13.7351	0.00104101	293	0.00137823	0.155695	255	0.00206442	0.153793	404	0.827244	0.00088087
wue1_expert1_model4	1	1.27089	1.33127	11.673	0.002919	313	0.00325878	0.131734	272	0.00451912	0.130691	397	0.743398	0.00193666
wue1_expert2_model1	1	1.202	1.31276	12.8069	0.0016558	331	0.00670916	0.11188	247	0.0014013	0.165314	349	0.282106	0.020237
wue1_expert2_model2	1	1.19584	1.31912	12.9698	0.00152631	350	0.0136314	0.0926818	234	0.00072764	0.184924	340	0.224024	0.0258176
wue1_expert2_model3	1	1.20361	1.32471	12.6785	0.0017656	347	0.0122321	0.095593	237	0.000848846	0.180301	351	0.296289	0.019089
wue1_expert2_model4	1	1.17419	1.30669	12.5712	0.0018629	369	0.0262348	0.075289	234	0.00072764	0.184924	324	0.142836	0.0374145
wue1_expert3_model1	1	1.21341	1.28366	11.8076	0.00272902	315	0.00353966	0.129448	269	0.00395106	0.134631	385	0.60696	0.00470181
wue1_expert3_model2	1	1.17847	1.27935	10.5088	0.00522443	364	0.0221982	0.079691	260	0.00261404	0.146803	352	0.303557	0.0185276
wue1_expert3_model3	1	1.19795	1.31281	11.8473	0.00267541	339	0.00910301	0.103577	254	0.00196812	0.15521	358	0.349631	0.0153351
wue1_expert3_model4	1	1.14872	1.24976	8.19508	0.0166135	386	0.0450378	0.0612578	284	0.00760584	0.115515	360	0.365928	0.014338
wue1_expert4_model1	1	1.24449	1.33898	13.004	0.00150043	318	0.00400242	0.126057	250	0.00162272	0.160945	365	0.408699	0.0119918
wue1_expert4_model2	1	1.12379	1.27255	12.1614	0.00228663	384	0.0423568	0.0628335	245	0.00126954	0.16826	295	0.0551903	0.0639013
wue1_expert4_model3	1	1.10928	1.24408	7.95935	0.0186917	429	0.146548	0.0322199	280	0.00641316	0.12047	321	0.130515	0.0398277
wue1_expert4_model4	1	1.17199	1.30047	12.1041	0.00235307	369	0.0262348	0.075289	244	0.00120804	0.169742	317	0.115388	0.0431626
wue1_expert5_model1	1	1.20282	1.30175	12.0166	0.00245825	339	0.00910301	0.103577	251	0.00170341	0.159501	359	0.357721	0.0148323
wue1_expert5_model2	1	1.20984	1.30964	12.346	0.00208495	325	0.0053029	0.118318	255	0.00206442	0.153793	365	0.408699	0.0119918
wue1_expert5_model3	1	1.20996	1.31	10.5753	0.00505357	346	0.0117948	0.0965735	267	0.00360923	0.137291	371	0.463769	0.00945286
wue1_expert5_model4	1	1.19552	1.28671	12.3907	0.00203892	334	0.00753105	0.108729	248	0.00147181	0.163851	362	0.38269	0.0133743

## Sheet: DG-cFOS signal intensity
DG-cFOS signal intensity	group mean (normalized to H)			Kruskal-Wallis ANOVA		Mann-Whitney-U-test: H vs. C-			Mann-Whitney-U-test: H vs. C+			Mann-Whitney-U-test: C- vs. C+
model/ensemble	H	C-	C+	H-statistic	p-value	U-statistic	p-value	eta^2	U-statistic	p-value	eta^2	U-statistic	p-value	eta^2
wue1_consensus1_ensemble	1	1.03867	1.05578	4.48766	0.106052	401	0.104133	0.0409617	335	0.0517721	0.0614643	393	0.854175	0.000645291
wue1_consensus1_model1	1	1.03939	1.05005	4.16041	0.124904	395	0.0883634	0.0450216	349	0.0807653	0.0495851	402	0.968129	4.03307e-05
wue1_consensus1_model2	1	1.03596	1.05516	4.71642	0.0945892	393	0.0835565	0.0464176	336	0.0535045	0.0605735	391	0.829176	0.000878313
wue1_consensus1_model3	1	1.02064	1.04317	3.47971	0.175546	420	0.169095	0.0293706	349	0.0807653	0.0495851	388	0.792007	0.00129506
wue1_consensus1_model4	1	1.03781	1.05699	4.35109	0.113546	411	0.135293	0.0346214	333	0.0484479	0.0632653	380	0.695382	0.00280074
wue1_consensus2_ensemble	1	1.03541	1.04811	3.80103	0.149491	408	0.125269	0.0364675	348	0.0783299	0.0503913	398	0.917262	0.000219578
wue1_consensus2_model1	1	1.03776	1.04829	3.84948	0.145914	407	0.12206	0.0370936	347	0.0759545	0.0512041	403	0.980874	1.79248e-05
wue1_consensus2_model2	1	1.03197	1.04889	3.91286	0.141362	402	0.106966	0.0403037	350	0.0832619	0.0487853	399	0.929955	0.000161323
wue1_consensus2_model3	1	1.04107	1.05125	4.32553	0.115006	390	0.0767455	0.0485514	349	0.0807653	0.0495851	400	0.942666	0.00011203
wue1_consensus2_model4	1	1.03032	1.05935	3.32907	0.189278	434	0.233696	0.0220606	348	0.0783299	0.0503913	370	0.581371	0.00548946
wue1_consensus3_ensemble	1	1.03788	1.05391	3.89736	0.142462	411	0.135293	0.0346214	343	0.067034	0.0545201	394	0.866731	0.000542224
wue1_consensus3_model1	1	1.04354	1.05838	4.32617	0.11497	399	0.0986449	0.0422937	341	0.0629081	0.0562171	395	0.879321	0.000448119
wue1_consensus3_model2	1	1.03573	1.04677	3.12515	0.209596	415	0.149609	0.0322344	363	0.121742	0.0389803	401	0.955392	7.1699e-05
wue1_consensus3_model3	1	1.03889	1.05601	4.15179	0.125444	403	0.10986	0.039651	342	0.064944	0.0553654	399	0.929955	0.000161323
wue1_consensus3_model4	1	1.03112	1.04976	2.94489	0.229364	434	0.233696	0.0220606	355	0.0966976	0.0448841	387	0.779718	0.00145191
wue1_consensus4_ensemble	1	1.03709	1.05162	4.17614	0.123926	405	0.115834	0.0383616	341	0.0629081	0.0562171	388	0.792007	0.00129506
wue1_consensus4_model1	1	1.03854	1.04964	4.05932	0.13138	403	0.10986	0.039651	345	0.0713801	0.0528491	396	0.891941	0.000362976
wue1_consensus4_model2	1	1.02141	1.04499	2.99195	0.22403	437	0.249561	0.02063	352	0.0884426	0.0472054	384	0.743189	0.0019762
wue1_consensus4_model3	1	1.03559	1.04934	3.63036	0.162809	411	0.135293	0.0346214	351	0.0858207	0.0479921	394	0.866731	0.000542224
wue1_consensus4_model4	1	1.03862	1.0511	4.25885	0.118905	395	0.0883634	0.0450216	346	0.0736383	0.0520233	404	0.993624	4.48119e-06
wue1_consensus5_ensemble	1	1.03928	1.05695	4.42974	0.109168	405	0.115834	0.0383616	334	0.0500869	0.0623615	388	0.792007	0.00129506
wue1_consensus5_model1	1	1.03882	1.05098	4.77224	0.0919859	387	0.070394	0.0507333	339	0.0589944	0.0579402	403	0.980874	1.79248e-05
wue1_consensus5_model2	1	1.03846	1.06219	4.86651	0.0877506	391	0.0789637	0.0478348	334	0.0500869	0.0623615	389	0.804349	0.00114718
wue1_consensus5_model3	1	1.04779	1.06254	4.41505	0.109973	400	0.101359	0.041625	338	0.0571146	0.0588114	392	0.841655	0.000757321
wue1_consensus5_model4	1	1.03756	1.05638	4.84907	0.0885192	402	0.106966	0.0403037	325	0.0368884	0.0707296	390	0.816739	0.00100827
wue1_consensus6_ensemble	1	1.03585	1.05389	3.956	0.138346	408	0.125269	0.0364675	344	0.069179	0.0536814	393	0.854175	0.000645291
wue1_consensus6_model1	1	1.04683	1.06087	4.74759	0.0931266	388	0.0724614	0.0500007	339	0.0589944	0.0579402	398	0.917262	0.000219578
wue1_consensus6_model2	1	1.03108	1.05524	4.39948	0.110832	405	0.115834	0.0383616	335	0.0517721	0.0614643	387	0.779718	0.00145191
wue1_consensus6_model3	1	1.03936	1.05011	3.93457	0.139836	404	0.112816	0.0390037	348	0.0783299	0.0503913	394	0.866731	0.000542224
wue1_consensus6_model4	1	1.03896	1.04769	3.96266	0.137886	393	0.0835565	0.0464176	357	0.102535	0.0433692	406	0.993624	4.48119e-06
wue1_consensus7_ensemble	1	1.03587	1.05086	3.99036	0.135989	410	0.131885	0.0352314	341	0.0629081	0.0562171	395	0.879321	0.000448119
wue1_consensus7_model1	1	1.03867	1.06011	4.8048	0.0905004	408	0.125269	0.0364675	323	0.0343966	0.0726607	382	0.719148	0.00237055
wue1_consensus7_model2	1	1.02645	1.04861	2.55703	0.278451	442	0.277647	0.0183523	366	0.132347	0.0368737	373	0.614657	0.00458874
wue1_consensus7_model3	1	1.04014	1.05297	4.84781	0.0885749	389	0.0745783	0.0492734	335	0.0517721	0.0614643	403	0.980874	1.79248e-05
wue1_consensus7_model4	1	1.04478	1.05974	4.81796	0.089907	387	0.070394	0.0507333	338	0.0571146	0.0588114	398	0.917262	0.000219578
wue1_consensus8_ensemble	1	1.03882	1.04999	4.11746	0.127616	399	0.0986449	0.0422937	347	0.0759545	0.0512041	395	0.879321	0.000448119
wue1_consensus8_model1	1	1.03718	1.04736	3.64833	0.161352	404	0.112816	0.0390037	356	0.0995823	0.0441234	408	0.968129	4.03307e-05
wue1_consensus8_model2	1	1.03686	1.05784	4.45874	0.107596	409	0.128544	0.0358468	331	0.0453048	0.0650924	383	0.731136	0.0021689
wue1_consensus8_model3	1	1.04412	1.05857	4.77899	0.0916759	402	0.106966	0.0403037	327	0.0395324	0.0688245	389	0.804349	0.00114718
wue1_consensus8_model4	1	1.03186	1.03934	3.3956	0.183086	405	0.115834	0.0383616	364	0.125201	0.0382716	419	0.829176	0.000878313
wue1_consensus9_ensemble	1	1.03311	1.05153	3.44753	0.178393	420	0.169095	0.0293706	351	0.0858207	0.0479921	383	0.731136	0.0021689
wue1_consensus9_model1	1	1.04234	1.05416	4.42856	0.109232	394	0.0859328	0.0457169	342	0.064944	0.0553654	404	0.993624	4.48119e-06
wue1_consensus9_model2	1	1.03623	1.04886	3.67965	0.158845	404	0.112816	0.0390037	355	0.0966976	0.0448841	407	0.980874	1.79248e-05
wue1_consensus9_model3	1	1.03961	1.06178	4.42121	0.109634	406	0.118915	0.0377249	335	0.0517721	0.0614643	380	0.695382	0.00280074
wue1_consensus9_model4	1	1.02284	1.04814	2.78303	0.248698	439	0.260548	0.019703	359	0.10865	0.0418802	378	0.671912	0.00326679
wue1_expert1_model1	1	1.01989	1.05588	2.69161	0.260331	459	0.388733	0.0116044	360	0.111814	0.0411455	353	0.410463	0.0121171
wue1_expert1_model2	1	1.02266	1.0557	2.05937	0.357119	472	0.48966	0.00748318	368	0.139806	0.0355018	367	0.548953	0.00647084
wue1_expert1_model3	1	1.00971	1.04638	1.58811	0.452009	509	0.838381	0.000681985	386	0.2221	0.0243248	347	0.358111	0.0150747
wue1_expert1_model4	1	1.02129	1.05317	2.6157	0.2704	462	0.410827	0.0105734	362	0.118359	0.0396955	351	0.392527	0.0130672
wue1_expert2_model1	1	1.03277	1.05013	3.31271	0.190833	417	0.157187	0.0310729	356	0.0995823	0.0441234	392	0.841655	0.000757321
wue1_expert2_model2	1	1.04336	1.05112	3.55791	0.168814	398	0.095989	0.0429677	365	0.128736	0.0375694	405	0.993624	0
wue1_expert2_model3	1	1.05444	1.06173	4.43148	0.109073	386	0.0683752	0.0514712	350	0.0832619	0.0487853	413	0.904589	0.000286796
wue1_expert2_model4	1	1.05397	1.06712	5.10002	0.0780808	383	0.0626026	0.0537169	334	0.0500869	0.0623615	400	0.942666	0.00011203
wue1_expert3_model1	1	1.05185	1.07773	5.34081	0.0692241	389	0.0745783	0.0492734	324	0.0356239	0.0716919	386	0.767483	0.00161771
wue1_expert3_model2	1	1.04835	1.05654	3.68203	0.158656	402	0.106966	0.0403037	357	0.102535	0.0433692	402	0.968129	4.03307e-05
wue1_expert3_model3	1	1.05923	1.06844	5.01676	0.0814001	381	0.0589828	0.0552408	338	0.0571146	0.0588114	409	0.955392	7.1699e-05
wue1_expert3_model4	1	1.04274	1.0525	4.7035	0.0952022	393	0.0835565	0.0464176	336	0.0535045	0.0605735	394	0.866731	0.000542224
wue1_expert4_model1	1	1.02199	1.04341	1.70482	0.426387	461	0.403381	0.0109118	379	0.18672	0.0284211	392	0.841655	0.000757321
wue1_expert4_model2	1	1.06056	1.06052	6.21788	0.0446482	349	0.0209208	0.0825201	348	0.0783299	0.0503913	449	0.486916	0.00867558
wue1_expert4_model3	1	1.05422	1.0671	7.63323	0.0220021	348	0.0202023	0.0834605	306	0.0184359	0.0901251	413	0.904589	0.000286796
wue1_expert4_model4	1	1.0382	1.05364	3.956	0.138346	405	0.115834	0.0383616	347	0.0759545	0.0512041	390	0.816739	0.00100827
wue1_expert5_model1	1	1.03277	1.05561	4.04658	0.13222	419	0.165052	0.0299327	336	0.0535045	0.0605735	377	0.660293	0.00351325
wue1_expert5_model2	1	1.03427	1.05586	3.1049	0.211728	437	0.249561	0.02063	349	0.0807653	0.0495851	382	0.719148	0.00237055
wue1_expert5_model3	1	1.03565	1.05802	2.3806	0.30413	443	0.283513	0.0179128	369	0.143654	0.0348255	381	0.707229	0.00258117
wue1_expert5_model4	1	1.03453	1.06567	4.71514	0.0946499	404	0.112816	0.0390037	330	0.0437989	0.0660157	375	0.637304	0.00403307

## Sheet: DG_infra-#cFOS+ nuclei
DG_infra-#cFOS+ nuclei	group mean (normalized to H)			Kruskal-Wallis ANOVA		Mann-Whitney-U-test: H vs. C-			Mann-Whitney-U-test: H vs. C+			Mann-Whitney-U-test: C- vs. C+
model/ensemble	H	C-	C+	H-statistic	p-value	U-statistic	p-value	eta^2	U-statistic	p-value	eta^2	U-statistic	p-value	eta^2
wue1_consensus1_ensemble	1	1.03824	1.24426	4.38976	0.111372	529	0.86735	0.000455827	330	0.0437989	0.0660157	315	0.10836	0.0448804
wue1_consensus1_model1	1	1.04824	1.27152	5.15402	0.0760007	518	0.757813	0.00150129	324	0.0356239	0.0716919	301	0.0681756	0.0578431
wue1_consensus1_model2	1	1.05739	1.24392	3.7814	0.150966	497	0.563154	0.00517792	340	0.0609252	0.0570754	331	0.175038	0.0320769
wue1_consensus1_model3	1	1.03364	1.22802	4.5527	0.102658	537	0.948779	7.56586e-05	338	0.0571146	0.0588114	301	0.0681756	0.0578431
wue1_consensus1_model4	1	1.03922	1.24905	4.27109	0.11818	528	0.857252	0.000525858	336	0.0535045	0.0605735	312	0.0984588	0.0475198
wue1_consensus2_ensemble	1	1.04645	1.25111	4.23295	0.120455	519	0.767607	0.00138124	333	0.0484479	0.0632653	318	0.119034	0.0423163
wue1_consensus2_model1	1	1.04338	1.2547	4.87189	0.0875151	517	0.748057	0.00162635	326	0.0381909	0.0697738	307	0.0835742	0.0520865
wue1_consensus2_model2	1	1.05392	1.24065	4.08007	0.130024	514	0.719037	0.00203153	343	0.067034	0.0545201	312	0.0984588	0.0475198
wue1_consensus2_model3	1	1.0225	1.23652	4.6964	0.0955412	544	0.989749	5.6275e-06	331	0.0453048	0.0650924	304	0.0755552	0.0549271
wue1_consensus2_model4	1	1.07384	1.2631	4.22547	0.120907	476	0.396453	0.0110605	335	0.0517721	0.0614643	331	0.175038	0.0320769
wue1_consensus3_ensemble	1	1.05313	1.24958	3.81448	0.148489	513	0.70945	0.00217659	339	0.0589944	0.0579402	326	0.151534	0.0358475
wue1_consensus3_model1	1	1.05099	1.24545	3.89807	0.142412	520	0.777439	0.00126619	337	0.055285	0.0596892	324	0.142836	0.0374145
wue1_consensus3_model2	1	1.069	1.25947	4.96708	0.0834472	496	0.554512	0.00540802	320	0.0309291	0.0756061	317	0.115388	0.0431626
wue1_consensus3_model3	1	1.05401	1.24459	3.53448	0.170804	509	0.671575	0.00280687	347	0.0759545	0.0512041	327	0.156032	0.0350766
wue1_consensus3_model4	1	1.05568	1.25519	4.24376	0.119806	504	0.625389	0.00370727	334	0.0500869	0.0623615	320	0.126596	0.0406488
wue1_consensus4_ensemble	1	1.05882	1.2674	4.16641	0.124531	514	0.719037	0.00203153	334	0.0500869	0.0623615	320	0.126596	0.0406488
wue1_consensus4_model1	1	1.06909	1.27387	4.75274	0.0928871	503	0.616318	0.00390236	322	0.0332056	0.073636	319	0.122769	0.0414784
wue1_consensus4_model2	1	1.07842	1.28371	4.52492	0.104094	483	0.448429	0.00885455	331	0.0453048	0.0650924	322	0.134527	0.0390149
wue1_consensus4_model3	1	1.04112	1.25916	4.70953	0.0949159	528	0.857252	0.000525858	327	0.0395324	0.0688245	309	0.0892934	0.0502347
wue1_consensus4_model4	1	1.05896	1.25172	5.40608	0.0670016	499	0.580628	0.00473273	318	0.028788	0.0776022	305	0.0781554	0.0539719
wue1_consensus5_ensemble	1	1.05484	1.26197	4.52508	0.104086	510	0.680971	0.0026418	331	0.0453048	0.0650924	313	0.101676	0.0466316
wue1_consensus5_model1	1	1.04405	1.26279	5.04903	0.0800971	525	0.827104	0.000765965	317	0.0277661	0.07861	311	0.0953236	0.0484164
wue1_consensus5_model2	1	1.05736	1.23943	4.04416	0.13238	503	0.616318	0.00390236	338	0.0571146	0.0588114	322	0.134527	0.0390149
wue1_consensus5_model3	1	1.03399	1.23779	4.08617	0.129628	522	0.797208	0.00105109	340	0.0609252	0.0570754	314	0.104976	0.0457518
wue1_consensus5_model4	1	1.05588	1.25054	4.11429	0.127819	510	0.680971	0.0026418	333	0.0484479	0.0632653	324	0.142836	0.0374145
wue1_consensus6_ensemble	1	1.05499	1.24939	4.17665	0.123895	503	0.616318	0.00390236	336	0.0535045	0.0605735	320	0.126596	0.0406488
wue1_consensus6_model1	1	1.05509	1.25679	4.6758	0.0965302	502	0.607306	0.00410245	328	0.0409136	0.0678817	314	0.104976	0.0457518
wue1_consensus6_model2	1	1.06656	1.251	3.92817	0.140284	496	0.554512	0.00540802	337	0.055285	0.0596892	330	0.170132	0.0328142
wue1_consensus6_model3	1	1.04897	1.25037	4.18922	0.123119	502	0.607306	0.00410245	339	0.0589944	0.0579402	316	0.111831	0.0440173
wue1_consensus6_model4	1	1.05556	1.28519	6.188	0.0453202	508	0.662231	0.00297695	309	0.0206593	0.0869066	292	0.0495139	0.0670435
wue1_consensus7_ensemble	1	1.05463	1.25799	4.50848	0.104953	507	0.652939	0.00315202	332	0.0468542	0.0641756	313	0.101676	0.0466316
wue1_consensus7_model1	1	1.05604	1.24279	4.10335	0.12852	514	0.719037	0.00203153	339	0.0589944	0.0579402	316	0.111831	0.0440173
wue1_consensus7_model2	1	1.06764	1.26854	4.51604	0.104557	488	0.48781	0.00742892	329	0.0423354	0.0669454	323	0.138633	0.0382105
wue1_consensus7_model3	1	1.04535	1.25745	4.24053	0.12	531	0.88761	0.000330772	344	0.069179	0.0536814	304	0.0755552	0.0549271
wue1_consensus7_model4	1	1.04451	1.24534	3.79361	0.150047	507	0.652939	0.00315202	348	0.0783299	0.0503913	317	0.115388	0.0431626
wue1_consensus8_ensemble	1	1.05178	1.24187	4.35479	0.113336	505	0.634517	0.00351719	334	0.0500869	0.0623615	316	0.111831	0.0440173
wue1_consensus8_model1	1	1.03703	1.25436	5.20614	0.0740459	532	0.897768	0.000275747	324	0.0356239	0.0716919	298	0.0613992	0.0608345
wue1_consensus8_model2	1	1.06422	1.25869	4.27443	0.117983	494	0.537427	0.00588324	332	0.0468542	0.0641756	325	0.147136	0.0366268
wue1_consensus8_model3	1	1.05634	1.23377	4.28869	0.117144	499	0.580628	0.00473273	334	0.0500869	0.0623615	320	0.126596	0.0406488
wue1_consensus8_model4	1	1.06649	1.27243	5.5404	0.0626494	495	0.545937	0.00564313	312	0.023113	0.0837466	310	0.092269	0.0493214
wue1_consensus9_ensemble	1	1.06776	1.26492	4.39763	0.110934	494	0.537427	0.00588324	331	0.0453048	0.0650924	322	0.134527	0.0390149
wue1_consensus9_model1	1	1.04745	1.24731	4.43492	0.108886	517	0.748057	0.00162635	333	0.0484479	0.0632653	312	0.0984588	0.0475198
wue1_consensus9_model2	1	1.04415	1.25995	4.93476	0.0848067	527	0.847177	0.000600892	324	0.0356239	0.0716919	306	0.0808279	0.053025
wue1_consensus9_model3	1	1.05929	1.26043	4.59289	0.100616	498	0.571859	0.00495282	331	0.0453048	0.0650924	314	0.104976	0.0457518
wue1_consensus9_model4	1	1.08018	1.25764	4.38986	0.111367	484	0.456158	0.00855942	328	0.0409136	0.0678817	331	0.175038	0.0320769
wue1_expert1_model1	1	1.10718	1.26125	2.65438	0.265222	461	0.298017	0.016613	364	0.125201	0.0382716	375	0.502665	0.00792783
wue1_expert1_model2	1	1.1004	1.25638	2.56374	0.277517	458	0.280481	0.0178585	367	0.136037	0.0361845	380	0.55361	0.00621008
wue1_expert1_model3	1	1.12643	1.28701	2.45577	0.292911	457	0.274795	0.0182837	371	0.151594	0.0334926	381	0.564094	0.00589167
wue1_expert1_model4	1	1.09117	1.25505	2.33095	0.311775	467	0.335243	0.014257	374	0.164125	0.031542	369	0.444967	0.0102656
wue1_expert2_model1	1	1.06527	1.26395	5.37272	0.0681284	501	0.598352	0.00430754	316	0.0267757	0.0796243	308	0.0863956	0.0511564
wue1_expert2_model2	1	1.05658	1.24822	5.67589	0.0585458	498	0.571859	0.00495282	312	0.023113	0.0837466	305	0.0781554	0.0539719
wue1_expert2_model3	1	1.06404	1.26721	4.76242	0.0924389	502	0.607306	0.00410245	322	0.0332056	0.073636	319	0.122769	0.0414784
wue1_expert2_model4	1	1.0457	1.24195	5.1453	0.076333	525	0.827104	0.000765965	327	0.0395324	0.0688245	297	0.0592683	0.0618484
wue1_expert3_model1	1	1.08772	1.22482	2.79698	0.24697	471	0.361656	0.0127863	365	0.128736	0.0375694	352	0.303557	0.0185276
wue1_expert3_model2	1	1.05261	1.22216	3.40997	0.181775	522	0.797208	0.00105109	350	0.0832619	0.0487853	325	0.147136	0.0366268
wue1_expert3_model3	1	1.07145	1.25333	3.8935	0.142737	484	0.456158	0.00855942	337	0.055285	0.0596892	337	0.206711	0.0278286
wue1_expert3_model4	1	1.02764	1.19722	2.27006	0.321412	528	0.857252	0.000525858	364	0.125201	0.0382716	352	0.303557	0.0185276
wue1_expert4_model1	1	1.10004	1.29878	4.17828	0.123793	455	0.26366	0.0191491	335	0.0517721	0.0614643	349	0.282106	0.020237
wue1_expert4_model2	1	1.02004	1.22721	6.58594	0.0371434	538	0.959013	5.06475e-05	306	0.0184359	0.0901251	282	0.034004	0.0780623
wue1_expert4_model3	1	0.990334	1.23162	5.41315	0.066765	571	0.719037	0.00203153	329	0.0423354	0.0669454	289	0.0443355	0.0702612
wue1_expert4_model4	1	1.0384	1.24976	6.2007	0.0450334	523	0.807143	0.000951047	312	0.023113	0.0837466	286	0.0396218	0.0735542
wue1_expert5_model1	1	1.05829	1.23559	3.81448	0.148489	512	0.69991	0.00232666	340	0.0609252	0.0570754	325	0.147136	0.0366268
wue1_expert5_model2	1	1.07553	1.26449	4.43674	0.108786	479	0.418268	0.0100851	326	0.0381909	0.0697738	335	0.195721	0.0292112
wue1_expert5_model3	1	1.05725	1.25477	3.17438	0.204499	505	0.634517	0.00351719	357	0.102535	0.0433692	329	0.165329	0.03356
wue1_expert5_model4	1	1.05962	1.23028	4.0999	0.128742	492	0.520611	0.00637846	335	0.0517721	0.0614643	328	0.16063	0.0343141

## Sheet: DG_infra-cFOS signal intensity
DG_infra-cFOS signal intensity	group mean (normalized to H)			Kruskal-Wallis ANOVA		Mann-Whitney-U-test: H vs. C-			Mann-Whitney-U-test: H vs. C+			Mann-Whitney-U-test: C- vs. C+
model/ensemble	H	C-	C+	H-statistic	p-value	U-statistic	p-value	eta^2	U-statistic	p-value	eta^2	U-statistic	p-value	eta^2
wue1_consensus1_ensemble	1	1.00211	1.01565	0.0301276	0.985049	521	0.963265	4.2624e-05	461	0.875899	0.000429945	397	0.904589	0.000286796
wue1_consensus1_model1	1	0.996379	1.00638	0.0799172	0.960829	553	0.717447	0.00208858	474	0.988673	7.31475e-06	402	0.968129	4.03307e-05
wue1_consensus1_model2	1	0.993988	1.01972	0.274888	0.871583	552	0.727304	0.00194206	457	0.831359	0.000781053	374	0.625936	0.00430642
wue1_consensus1_model3	1	0.988188	1.01377	0.603693	0.739451	564	0.61242	0.00405195	437	0.619257	0.00409707	364	0.517454	0.00753288
wue1_consensus1_model4	1	0.998619	1.01369	0.190766	0.909025	549	0.757141	0.00153447	463	0.898327	0.000293403	379	0.683609	0.00302928
wue1_consensus2_ensemble	1	1.00066	1.01202	0.0769251	0.962268	547	0.777239	0.00128938	473	1	8.1275e-07	394	0.866731	0.000542224
wue1_consensus2_model1	1	1.00323	1.01387	0.0819008	0.959877	550	0.747152	0.001665	471	0.988673	7.31475e-06	396	0.891941	0.000362976
wue1_consensus2_model2	1	0.993254	1.01355	0.253944	0.880758	546	0.787345	0.00117483	454	0.798298	0.00111266	374	0.625936	0.00430642
wue1_consensus2_model3	1	1.00794	1.01504	0.0121537	0.993942	523	0.984252	1.0656e-05	465	0.920836	0.000182869	400	0.942666	0.00011203
wue1_consensus2_model4	1	0.98569	1.02135	0.855164	0.652084	587	0.418354	0.0102404	471	0.988673	7.31475e-06	356	0.438261	0.0107593
wue1_consensus3_ensemble	1	0.998572	1.01323	0.134956	0.934748	551	0.737206	0.00180087	474	0.988673	7.31475e-06	387	0.779718	0.00145191
wue1_consensus3_model1	1	0.997927	1.01704	0.265695	0.875599	561	0.640396	0.00345255	480	0.920836	0.000182869	380	0.695382	0.00280074
wue1_consensus3_model2	1	0.994131	1.01057	0.228725	0.891935	569	0.567039	0.00515751	479	0.932115	0.000137355	397	0.904589	0.000286796
wue1_consensus3_model3	1	1.0027	1.02	0.234329	0.889439	544	0.807663	0.000961705	456	0.820302	0.000885085	374	0.625936	0.00430642
wue1_consensus3_model4	1	0.988467	1.00551	0.249262	0.882823	561	0.640396	0.00345255	479	0.932115	0.000137355	382	0.719148	0.00237055
wue1_consensus4_ensemble	1	0.996588	1.01083	0.0989945	0.951708	551	0.737206	0.00180087	474	0.988673	7.31475e-06	394	0.866731	0.000542224
wue1_consensus4_model1	1	0.99063	1.00906	0.243967	0.885163	563	0.621685	0.00384682	473	1	8.1275e-07	384	0.743189	0.0019762
wue1_consensus4_model2	1	0.981292	1.0042	0.62139	0.732937	576	0.50635	0.00692907	465	0.920836	0.000182869	362	0.496986	0.00828572
wue1_consensus4_model3	1	0.998263	1.00632	0.0325319	0.983866	542	0.828112	0.000769897	474	0.988673	7.31475e-06	402	0.968129	4.03307e-05
wue1_consensus4_model4	1	0.993843	1.0141	0.322975	0.850877	566	0.594075	0.00447819	465	0.920836	0.000182869	378	0.671912	0.00326679
wue1_consensus5_ensemble	1	0.998412	1.01488	0.162504	0.921961	550	0.747152	0.001665	464	0.909572	0.000234885	383	0.731136	0.0021689
wue1_consensus5_model1	1	1.00763	1.01455	0.0339745	0.983156	542	0.828112	0.000769897	470	0.977347	2.03188e-05	400	0.942666	0.00011203
wue1_consensus5_model2	1	0.996024	1.0239	0.370474	0.830908	552	0.727304	0.00194206	451	0.765594	0.00150278	368	0.55966	0.00613475
wue1_consensus5_model3	1	1.00563	1.02412	0.211754	0.899535	559	0.659338	0.00307959	465	0.920836	0.000182869	384	0.743189	0.0019762
wue1_consensus5_model4	1	0.997316	1.01616	0.120346	0.941602	544	0.807663	0.000961705	466	0.932115	0.000137355	384	0.743189	0.0019762
wue1_consensus6_ensemble	1	0.995104	1.01411	0.147773	0.928777	550	0.747152	0.001665	464	0.909572	0.000234885	385	0.755306	0.00179248
wue1_consensus6_model1	1	1.00053	1.01797	0.153623	0.926064	556	0.688162	0.00256011	466	0.932115	0.000137355	389	0.804349	0.00114718
wue1_consensus6_model2	1	0.992922	1.02239	0.483115	0.785404	547	0.777239	0.00128938	437	0.619257	0.00409707	365	0.527849	0.0071699
wue1_consensus6_model3	1	0.997298	1.01298	0.300875	0.860332	559	0.659338	0.00307959	466	0.932115	0.000137355	374	0.625936	0.00430642
wue1_consensus6_model4	1	0.993422	1.00334	0.136953	0.933815	553	0.717447	0.00208858	485	0.864721	0.000507969	394	0.866731	0.000542224
wue1_consensus7_ensemble	1	0.9955	1.01046	0.151478	0.927058	560	0.649838	0.0032634	476	0.966027	3.98248e-05	396	0.891941	0.000362976
wue1_consensus7_model1	1	1.00043	1.02055	0.187714	0.910413	545	0.797487	0.0010656	465	0.920836	0.000182869	376	0.648757	0.00376868
wue1_consensus7_model2	1	0.987836	1.01124	0.397407	0.819793	566	0.594075	0.00447819	465	0.920836	0.000182869	371	0.592373	0.00518026
wue1_consensus7_model3	1	0.997068	1.01496	0.131328	0.936445	549	0.757141	0.00153447	459	0.853571	0.000592495	388	0.792007	0.00129506
wue1_consensus7_model4	1	0.999606	1.02393	0.336059	0.845329	562	0.631011	0.00364702	461	0.875899	0.000429945	374	0.625936	0.00430642
wue1_consensus8_ensemble	1	0.998906	1.01348	0.105718	0.948514	547	0.777239	0.00128938	474	0.988673	7.31475e-06	388	0.792007	0.00129506
wue1_consensus8_model1	1	1.00247	1.00934	0.00715288	0.99643	540	0.848678	0.000599401	468	0.954713	6.58328e-05	414	0.891941	0.000362976
wue1_consensus8_model2	1	0.995522	1.01676	0.26945	0.873956	559	0.659338	0.00307959	468	0.954713	6.58328e-05	377	0.660293	0.00351325
wue1_consensus8_model3	1	0.996207	1.01789	0.477172	0.787741	571	0.549349	0.00563703	462	0.887102	0.000358423	369	0.570466	0.00580762
wue1_consensus8_model4	1	0.993135	1.00346	0.0711755	0.965038	545	0.797487	0.0010656	477	0.954713	6.58328e-05	394	0.866731	0.000542224
wue1_consensus9_ensemble	1	0.994326	1.0134	0.210947	0.899898	560	0.649838	0.0032634	472	1	8.1275e-07	385	0.755306	0.00179248
wue1_consensus9_model1	1	1.00018	1.01469	0.0934178	0.954365	550	0.747152	0.001665	474	0.988673	7.31475e-06	394	0.866731	0.000542224
wue1_consensus9_model2	1	0.997872	1.00806	0.0682458	0.966453	549	0.757141	0.00153447	480	0.920836	0.000182869	406	0.993624	4.48119e-06
wue1_consensus9_model3	1	0.999329	1.02315	0.505593	0.776626	562	0.631011	0.00364702	452	0.776452	0.00136623	363	0.507166	0.00790482
wue1_consensus9_model4	1	0.984996	1.01324	0.456794	0.795808	570	0.55816	0.00539461	469	0.966027	3.98248e-05	369	0.570466	0.00580762
wue1_expert1_model1	1	0.987165	1.05013	2.72857	0.255563	572	0.540607	0.00588478	384	0.211534	0.0254627	311	0.13509	0.0395958
wue1_expert1_model2	1	0.991144	1.04951	2.50763	0.285414	588	0.410827	0.0105734	383	0.206389	0.0260413	324	0.198248	0.0294011
wue1_expert1_model3	1	0.979781	1.04108	3.31477	0.190637	611	0.260548	0.019703	386	0.2221	0.0243248	308	0.123007	0.0421635
wue1_expert1_model4	1	0.984426	1.0335	1.99227	0.369304	581	0.465191	0.00835431	409	0.371093	0.0131089	323	0.192731	0.0301315
wue1_expert2_model1	1	0.984355	1.00905	0.522368	0.770139	572	0.540607	0.00588478	464	0.909572	0.000234885	366	0.538349	0.00681589
wue1_expert2_model2	1	0.993886	1.01133	0.145316	0.929919	555	0.697874	0.0023976	482	0.898327	0.000293403	393	0.854175	0.000645291
wue1_expert2_model3	1	1.00451	1.02115	0.210404	0.900143	561	0.640396	0.00345255	470	0.977347	2.03188e-05	386	0.767483	0.00161771
wue1_expert2_model4	1	1.00951	1.036	0.426615	0.807908	536	0.890106	0.000322344	436	0.60928	0.00433115	367	0.548953	0.00647084
wue1_expert3_model1	1	1.0005	1.05147	1.3804	0.501476	570	0.55816	0.00539461	427	0.522903	0.00673039	332	0.246577	0.0238803
wue1_expert3_model2	1	1.00166	1.03168	0.494851	0.780808	551	0.737206	0.00180087	438	0.629304	0.0038695	365	0.527849	0.0071699
wue1_expert3_model3	1	1.00842	1.03799	0.382382	0.825975	555	0.697874	0.0023976	435	0.599376	0.00457172	377	0.660293	0.00351325
wue1_expert3_model4	1	1.00689	1.02431	0.713541	0.699933	536	0.890106	0.000322344	410	0.378735	0.0126992	369	0.570466	0.00580762
wue1_expert4_model1	1	0.976561	1.00429	0.723541	0.696442	587	0.418354	0.0102404	493	0.776452	0.00136623	370	0.581371	0.00548946
wue1_expert4_model2	1	1.00696	1.01437	0.000924627	0.999538	531	0.942304	9.59041e-05	470	0.977347	2.03188e-05	408	0.968129	4.03307e-05
wue1_expert4_model3	1	1.02773	1.01834	0.47792	0.787446	474	0.50635	0.00692907	447	0.722641	0.00211396	426	0.743189	0.0019762
wue1_expert4_model4	1	0.994965	1.00918	0.294036	0.863278	560	0.649838	0.0032634	471	0.988673	7.31475e-06	375	0.637304	0.00403307
wue1_expert5_model1	1	0.989513	1.01486	0.407191	0.815792	568	0.575985	0.00492574	464	0.909572	0.000234885	372	0.603469	0.00488002
wue1_expert5_model2	1	0.989221	1.0138	0.564369	0.754134	572	0.540607	0.00588478	458	0.842449	0.000683523	364	0.517454	0.00753288
wue1_expert5_model3	1	0.989287	1.0231	0.86475	0.648966	578	0.48966	0.00748318	465	0.920836	0.000182869	348	0.366532	0.0145594
wue1_expert5_model4	1	0.988382	1.02529	0.59616	0.742242	566	0.594075	0.00447819	450	0.754782	0.00164582	360	0.476958	0.00907441

## Sheet: DG_supra-#cFOS+ nuclei
DG_supra-#cFOS+ nuclei	group mean (normalized to H)			Kruskal-Wallis ANOVA		Mann-Whitney-U-test: H vs. C-			Mann-Whitney-U-test: H vs. C+			Mann-Whitney-U-test: C- vs. C+
model/ensemble	H	C-	C+	H-statistic	p-value	U-statistic	p-value	eta^2	U-statistic	p-value	eta^2	U-statistic	p-value	eta^2
wue1_consensus1_ensemble	1	1.374	1.3701	19.2382	6.64461e-05	256	0.000238267	0.205297	206	0.000159066	0.230893	419	1	1.04741e-06
wue1_consensus1_model1	1	1.36539	1.35949	18.2703	0.000107811	259	0.000276896	0.20102	217	0.000294261	0.212226	421	0.975129	2.61852e-05
wue1_consensus1_model2	1	1.3889	1.39811	19.8945	4.78602e-05	248	0.000158514	0.216922	205	0.000150243	0.232629	406	0.851613	0.00065463
wue1_consensus1_model3	1	1.42094	1.4417	23.8058	6.77069e-06	221	3.71969e-05	0.25852	179	3.18532e-05	0.280049	411	0.913108	0.000235667
wue1_consensus1_model4	1	1.38034	1.35875	19.0256	7.39008e-05	252	0.000194585	0.211069	213	0.00023591	0.218923	427	0.900755	0.000302701
wue1_consensus2_ensemble	1	1.38829	1.38859	19.5926	5.56569e-05	252	0.000194585	0.211069	205	0.000150243	0.232629	415	0.9627	5.1323e-05
wue1_consensus2_model1	1	1.38573	1.38457	18.5422	9.41068e-05	251	0.000184906	0.212525	221	0.000365927	0.205633	416	0.975129	2.61852e-05
wue1_consensus2_model2	1	1.38653	1.41042	20.1943	4.11969e-05	247	0.000150535	0.218398	202	0.000126456	0.237877	403	0.81512	0.00100656
wue1_consensus2_model3	1	1.37455	1.39065	20.1848	4.13932e-05	260	0.000291026	0.199604	190	6.23788e-05	0.25945	404	0.827244	0.00088087
wue1_consensus2_model4	1	1.42716	1.37626	18.209	0.000111165	257	0.000250543	0.203866	221	0.000365927	0.205633	448	0.651223	0.00364603
wue1_consensus3_ensemble	1	1.39676	1.38911	20.1472	4.21781e-05	238	9.39074e-05	0.231904	211	0.000210987	0.222311	420	0.987563	9.42667e-06
wue1_consensus3_model1	1	1.38023	1.39442	19.0778	7.19962e-05	259	0.000276896	0.20102	206	0.000159066	0.230893	405	0.839409	0.00076356
wue1_consensus3_model2	1	1.40781	1.4206	20.5547	3.44031e-05	250	0.000175681	0.213986	194	7.91903e-05	0.252155	408	0.876124	0.000461907
wue1_consensus3_model3	1	1.4006	1.39125	19.7918	5.03817e-05	246	0.000142935	0.219878	208	0.000178196	0.227441	421	0.975129	2.61852e-05
wue1_consensus3_model4	1	1.4061	1.37625	18.2544	0.000108669	250	0.000175681	0.213986	227	0.000504552	0.195939	437	0.779024	0.0014339
wue1_consensus4_ensemble	1	1.37882	1.38352	19.3713	6.21701e-05	251	0.000184906	0.212525	209	0.000188553	0.225724	421	0.975129	2.61852e-05
wue1_consensus4_model1	1	1.36679	1.37286	16.8852	0.000215492	278	0.000694113	0.174978	219	0.000328268	0.208917	420	0.987563	9.42667e-06
wue1_consensus4_model2	1	1.40416	1.38965	18.8886	7.91391e-05	247	0.000150535	0.218398	220	0.000346619	0.207272	422	0.9627	5.1323e-05
wue1_consensus4_model3	1	1.39308	1.38341	18.4071	0.000100682	253	0.000204739	0.209619	221	0.000365927	0.205633	422	0.9627	5.1323e-05
wue1_consensus4_model4	1	1.36645	1.39087	18.7661	8.41361e-05	258	0.000263411	0.20244	212	0.000223122	0.220614	395	0.719944	0.00231372
wue1_consensus5_ensemble	1	1.36925	1.37685	18.5501	9.37334e-05	257	0.000250543	0.203866	215	0.000263576	0.215562	414	0.950281	8.484e-05
wue1_consensus5_model1	1	1.3591	1.37138	17.8304	0.000134332	277	0.000662266	0.176304	206	0.000159066	0.230893	419	1	1.04741e-06
wue1_consensus5_model2	1	1.39223	1.39103	20.3015	3.90476e-05	245	0.000135698	0.221364	202	0.000126456	0.237877	413	0.937874	0.000126736
wue1_consensus5_model3	1	1.36993	1.36804	17.8654	0.000131999	257	0.000250543	0.203866	225	0.000453662	0.199144	417	0.987563	9.42667e-06
wue1_consensus5_model4	1	1.36418	1.37679	18.325	0.000104899	269	0.000452293	0.187089	207	0.000168376	0.229164	409	0.888426	0.000378114
wue1_consensus6_ensemble	1	1.38464	1.38898	19.5887	5.57654e-05	252	0.000194585	0.211069	205	0.000150243	0.232629	417	0.987563	9.42667e-06
wue1_consensus6_model1	1	1.35861	1.34506	16.7449	0.00023115	271	0.000497999	0.184362	228	0.000531948	0.194346	426	0.913108	0.000235667
wue1_consensus6_model2	1	1.4004	1.40022	20.802	3.04022e-05	242	0.000116002	0.225851	198	0.000100224	0.244964	415	0.9627	5.1323e-05
wue1_consensus6_model3	1	1.37707	1.38583	17.0386	0.000199579	275	0.000602607	0.17897	220	0.000346619	0.207272	410	0.900755	0.000302701
wue1_consensus6_model4	1	1.35068	1.38099	19.5775	5.60788e-05	265	0.000372384	0.192601	195	8.4018e-05	0.250347	391	0.673837	0.00316841
wue1_consensus7_ensemble	1	1.37287	1.3857	18.4106	0.000100508	256	0.000238267	0.205297	218	0.000310829	0.210568	414	0.950281	8.484e-05
wue1_consensus7_model1	1	1.39001	1.36473	18.2156	0.000110799	246	0.000142935	0.219878	233	0.000690952	0.186478	448	0.651223	0.00364603
wue1_consensus7_model2	1	1.41509	1.40135	20.7245	3.16028e-05	236	8.44127e-05	0.23496	205	0.000150243	0.232629	426	0.913108	0.000235667
wue1_consensus7_model3	1	1.34491	1.36186	18.1349	0.00011536	260	0.000291026	0.199604	218	0.000310829	0.210568	421	0.975129	2.61852e-05
wue1_consensus7_model4	1	1.37144	1.38124	18.3822	0.000101944	267	0.000410526	0.189835	208	0.000178196	0.227441	410	0.900755	0.000302701
wue1_consensus8_ensemble	1	1.38749	1.39204	19.5118	5.79524e-05	249	0.00016689	0.215451	209	0.000188553	0.225724	419	1	1.04741e-06
wue1_consensus8_model1	1	1.38656	1.40259	20.713	3.17848e-05	250	0.000175681	0.213986	192	7.03107e-05	0.25579	406	0.851613	0.00065463
wue1_consensus8_model2	1	1.40064	1.37447	19.4182	6.0729e-05	242	0.000116002	0.225851	218	0.000310829	0.210568	437	0.779024	0.0014339
wue1_consensus8_model3	1	1.35055	1.34569	14.8608	0.00059294	293	0.00137823	0.155695	236	0.000806505	0.181836	420	0.987563	9.42667e-06
wue1_consensus8_model4	1	1.41033	1.41883	22.2943	1.44165e-05	231	6.44887e-05	0.242688	189	5.87381e-05	0.26129	407	0.863852	0.000554079
wue1_consensus9_ensemble	1	1.40204	1.38615	18.6224	9.04062e-05	248	0.000158514	0.216922	223	0.000407595	0.202376	426	0.913108	0.000235667
wue1_consensus9_model1	1	1.37723	1.3927	20.2636	3.97944e-05	249	0.00016689	0.215451	199	0.000106253	0.243182	406	0.851613	0.00065463
wue1_consensus9_model2	1	1.40285	1.38784	20.075	4.37281e-05	246	0.000142935	0.219878	204	0.000141882	0.234372	425	0.925482	0.000177012
wue1_consensus9_model3	1	1.38132	1.35278	16.5287	0.000257542	267	0.000410526	0.189835	236	0.000806505	0.181836	438	0.767093	0.00159311
wue1_consensus9_model4	1	1.4378	1.40328	18.5914	9.182e-05	247	0.000150535	0.218398	225	0.000453662	0.199144	436	0.791007	0.00128307
wue1_expert1_model1	1	1.61233	1.52452	22.671	1.19412e-05	228	5.47657e-05	0.247385	187	5.20517e-05	0.26499	443	0.708314	0.00251483
wue1_expert1_model2	1	1.62876	1.53831	22.7001	1.17691e-05	225	4.64428e-05	0.252128	190	6.23788e-05	0.25945	447	0.662492	0.00340303
wue1_expert1_model3	1	1.65941	1.57667	23.5749	7.59947e-06	223	4.15767e-05	0.255314	180	3.38926e-05	0.278144	441	0.73164	0.002121
wue1_expert1_model4	1	1.53187	1.47124	20.7547	3.113e-05	244	0.000128807	0.222855	197	9.45197e-05	0.246752	446	0.673837	0.00316841
wue1_expert2_model1	1	1.41232	1.41085	22.8883	1.07117e-05	229	5.78409e-05	0.245815	183	4.07814e-05	0.272467	412	0.925482	0.000177012
wue1_expert2_model2	1	1.39687	1.42372	21.335	2.32897e-05	242	0.000116002	0.225851	192	7.03107e-05	0.25579	395	0.719944	0.00231372
wue1_expert2_model3	1	1.40372	1.4117	19.8074	4.99896e-05	245	0.000135698	0.221364	209	0.000188553	0.225724	408	0.876124	0.000461907
wue1_expert2_model4	1	1.37398	1.41062	21.8253	1.82263e-05	252	0.000194585	0.211069	177	2.81187e-05	0.283878	392	0.685258	0.00294217
wue1_expert3_model1	1	1.41047	1.38224	17.5526	0.000154351	260	0.000291026	0.199604	227	0.000504552	0.195939	433	0.827244	0.00088087
wue1_expert3_model2	1	1.37276	1.38509	18.3024	0.00010609	278	0.000694113	0.174978	200	0.000112622	0.241407	399	0.767093	0.00159311
wue1_expert3_model3	1	1.38708	1.41953	19.1086	7.08967e-05	262	0.000321336	0.196788	203	0.00013396	0.236121	402	0.80304	0.00114063
wue1_expert3_model4	1	1.34727	1.35825	18.755	8.46063e-05	264	0.00035458	0.193992	206	0.000159066	0.230893	403	0.81512	0.00100656
wue1_expert4_model1	1	1.47582	1.44038	19.6628	5.3737e-05	253	0.000204739	0.209619	203	0.00013396	0.236121	439	0.755217	0.00176069
wue1_expert4_model2	1	1.29144	1.36373	20.7325	3.14775e-05	266	0.000391021	0.191215	183	4.07814e-05	0.272467	366	0.417597	0.0115477
wue1_expert4_model3	1	1.30378	1.28819	13.2573	0.00132197	304	0.00222936	0.142269	252	0.00178777	0.158065	416	0.975129	2.61852e-05
wue1_expert4_model4	1	1.38554	1.40416	20.7734	3.08394e-05	244	0.000128807	0.222855	197	9.45197e-05	0.246752	403	0.81512	0.00100656
wue1_expert5_model1	1	1.42223	1.41174	22.4903	1.30706e-05	226	4.90739e-05	0.250542	191	6.62325e-05	0.257617	426	0.913108	0.000235667
wue1_expert5_model2	1	1.42369	1.40934	19.654	5.39743e-05	246	0.000142935	0.219878	210	0.000199474	0.224014	415	0.9627	5.1323e-05
wue1_expert5_model3	1	1.44216	1.40417	18.9097	7.83076e-05	248	0.000158514	0.216922	219	0.000328268	0.208917	433	0.827244	0.00088087
wue1_expert5_model4	1	1.39662	1.37757	20.2208	4.06546e-05	240	0.000104404	0.228867	208	0.000178196	0.227441	413	0.937874	0.000126736

## Sheet: DG_supra-cFOS signal intensity
DG_supra-cFOS signal intensity	group mean (normalized to H)			Kruskal-Wallis ANOVA		Mann-Whitney-U-test: H vs. C-			Mann-Whitney-U-test: H vs. C+			Mann-Whitney-U-test: C- vs. C+
model/ensemble	H	C-	C+	H-statistic	p-value	U-statistic	p-value	eta^2	U-statistic	p-value	eta^2	U-statistic	p-value	eta^2
wue1_consensus1_ensemble	1	1.10334	1.12625	11.0674	0.0039513	310	0.00476341	0.123144	274	0.00493791	0.128097	417	0.854175	0.000645291
wue1_consensus1_model1	1	1.10865	1.12585	12.6899	0.00175557	291	0.00212178	0.14587	264	0.00314672	0.141328	420	0.816739	0.00100827
wue1_consensus1_model2	1	1.10966	1.12769	10.7948	0.00452838	313	0.00538363	0.119731	277	0.0056321	0.124254	431	0.683609	0.00302928
wue1_consensus1_model3	1	1.07486	1.10226	8.41594	0.0148765	335	0.0126442	0.0961705	302	0.0157987	0.0945074	415	0.879321	0.000448119
wue1_consensus1_model4	1	1.10363	1.13048	11.0721	0.00394204	315	0.00583669	0.117483	269	0.00395106	0.134631	401	0.955392	7.1699e-05
wue1_consensus2_ensemble	1	1.09978	1.11939	9.94875	0.00691285	316	0.00607587	0.116366	290	0.00976899	0.108279	421	0.804349	0.00114718
wue1_consensus2_model1	1	1.10575	1.11976	10.64	0.00489287	308	0.00438664	0.125445	285	0.0079335	0.114293	425	0.755306	0.00179248
wue1_consensus2_model2	1	1.09793	1.10998	10.1174	0.00635382	312	0.00516922	0.120863	293	0.0110438	0.104748	438	0.603469	0.00488002
wue1_consensus2_model3	1	1.09973	1.11438	9.70728	0.00779993	315	0.00583669	0.117483	297	0.0129726	0.100132	429	0.707229	0.00258117
wue1_consensus2_model4	1	1.10899	1.13485	9.02697	0.0109602	334	0.0121831	0.0971855	290	0.00976899	0.108279	404	0.993624	4.48119e-06
wue1_consensus3_ensemble	1	1.10811	1.12953	10.5971	0.00499893	314	0.00560603	0.118604	279	0.0061426	0.121725	419	0.829176	0.000878313
wue1_consensus3_model1	1	1.11437	1.13068	10.5765	0.00505053	310	0.00476341	0.123144	284	0.00760584	0.115515	424	0.767483	0.00161771
wue1_consensus3_model2	1	1.10814	1.11277	9.34102	0.00936749	314	0.00560603	0.118604	307	0.0191526	0.0890457	434	0.648757	0.00376868
wue1_consensus3_model3	1	1.10449	1.12246	11.0885	0.00390981	309	0.00457151	0.124292	275	0.00516019	0.126809	424	0.767483	0.00161771
wue1_consensus3_model4	1	1.10465	1.12238	8.50572	0.0142235	331	0.010888	0.100262	304	0.0170727	0.0923033	410	0.942666	0.00011203
wue1_consensus4_ensemble	1	1.10707	1.12914	11.6066	0.00301758	300	0.00313478	0.134865	274	0.00493791	0.128097	411	0.929955	0.000161323
wue1_consensus4_model1	1	1.11435	1.12221	10.6853	0.00478316	309	0.00457151	0.124292	283	0.00729036	0.116744	425	0.755306	0.00179248
wue1_consensus4_model2	1	1.09121	1.11702	9.26666	0.00972234	329	0.010094	0.10234	290	0.00976899	0.108279	411	0.929955	0.000161323
wue1_consensus4_model3	1	1.10668	1.12661	10.954	0.00418192	312	0.00516922	0.120863	274	0.00493791	0.128097	413	0.904589	0.000286796
wue1_consensus4_model4	1	1.10961	1.1159	10.142	0.00627607	308	0.00438664	0.125445	296	0.0124644	0.101276	431	0.683609	0.00302928
wue1_consensus5_ensemble	1	1.10866	1.1285	11.7323	0.00283376	304	0.00371301	0.130113	268	0.00377663	0.135958	423	0.779718	0.00145191
wue1_consensus5_model1	1	1.10355	1.12296	12.7217	0.00172792	293	0.00231664	0.143387	262	0.00286911	0.144053	430	0.695382	0.00280074
wue1_consensus5_model2	1	1.11501	1.13367	10.9932	0.00410069	312	0.00516922	0.120863	274	0.00493791	0.128097	429	0.707229	0.00258117
wue1_consensus5_model3	1	1.11847	1.13708	10.6369	0.00490029	318	0.00658089	0.11415	274	0.00493791	0.128097	407	0.980874	1.79248e-05
wue1_consensus5_model4	1	1.10938	1.12807	12.1087	0.00234764	299	0.00300367	0.136067	267	0.00360923	0.137291	432	0.671912	0.00326679
wue1_consensus6_ensemble	1	1.10644	1.12636	10.7902	0.00453868	309	0.00457151	0.124292	281	0.0066944	0.119222	426	0.743189	0.0019762
wue1_consensus6_model1	1	1.12356	1.13561	12.3544	0.00207624	296	0.00263979	0.139703	266	0.00344861	0.13863	435	0.637304	0.00403307
wue1_consensus6_model2	1	1.10084	1.12413	9.92514	0.00699491	324	0.00833016	0.107628	282	0.00698667	0.11798	421	0.804349	0.00114718
wue1_consensus6_model3	1	1.11418	1.12123	10.1558	0.00623305	317	0.00632384	0.115255	285	0.0079335	0.114293	425	0.755306	0.00179248
wue1_consensus6_model4	1	1.11397	1.12155	10.6977	0.00475362	302	0.00341276	0.132478	293	0.0110438	0.104748	441	0.570466	0.00580762
wue1_consensus7_ensemble	1	1.10722	1.12431	10.4003	0.00551581	315	0.00583669	0.117483	282	0.00698667	0.11798	422	0.792007	0.00129506
wue1_consensus7_model1	1	1.10989	1.13174	10.9608	0.00416766	313	0.00538363	0.119731	273	0.00472431	0.129391	419	0.829176	0.000878313
wue1_consensus7_model2	1	1.09397	1.11594	8.70021	0.0129055	328	0.00971673	0.103387	304	0.0170727	0.0923033	425	0.755306	0.00179248
wue1_consensus7_model3	1	1.10779	1.11982	10.6974	0.00475432	304	0.00371301	0.130113	289	0.00937417	0.109469	431	0.683609	0.00302928
wue1_consensus7_model4	1	1.12025	1.12868	12.0134	0.00246224	301	0.00327108	0.133669	266	0.00344861	0.13863	424	0.767483	0.00161771
wue1_consensus8_ensemble	1	1.10854	1.11897	11.5354	0.0031269	300	0.00313478	0.134865	277	0.0056321	0.124254	433	0.660293	0.00351325
wue1_consensus8_model1	1	1.10565	1.11608	10.6701	0.00481965	304	0.00371301	0.130113	290	0.00976899	0.108279	434	0.648757	0.00376868
wue1_consensus8_model2	1	1.1039	1.12993	11.6066	0.00301758	308	0.00438664	0.125445	266	0.00344861	0.13863	419	0.829176	0.000878313
wue1_consensus8_model3	1	1.12572	1.13122	12.2437	0.00219445	299	0.00300367	0.136067	264	0.00314672	0.141328	426	0.743189	0.0019762
wue1_consensus8_model4	1	1.09882	1.10582	9.82509	0.00735374	308	0.00438664	0.125445	305	0.0177428	0.0912109	442	0.55966	0.00613475
wue1_consensus9_ensemble	1	1.09995	1.12469	10.2198	0.00603664	321	0.00740934	0.110865	279	0.0061426	0.121725	412	0.917262	0.000219578
wue1_consensus9_model1	1	1.11178	1.12225	10.982	0.00412373	315	0.00583669	0.117483	271	0.00432203	0.131998	429	0.707229	0.00258117
wue1_consensus9_model2	1	1.10261	1.12245	10.9564	0.00417678	307	0.00420858	0.126604	281	0.0066944	0.119222	436	0.625936	0.00430642
wue1_consensus9_model3	1	1.11126	1.13855	11.7706	0.00278008	310	0.00476341	0.123144	261	0.00273886	0.145425	407	0.980874	1.79248e-05
wue1_consensus9_model4	1	1.0935	1.11694	7.72159	0.0210512	349	0.0209208	0.0825201	303	0.0164248	0.0934021	414	0.891941	0.000362976
wue1_expert1_model1	1	1.09343	1.09843	5.97428	0.0504314	353	0.0240222	0.0788119	342	0.064944	0.0553654	416	0.866731	0.000542224
wue1_expert1_model2	1	1.09975	1.10039	7.49963	0.0235221	338	0.0141214	0.0931575	320	0.0309291	0.0756061	418	0.841655	0.000757321
wue1_expert1_model3	1	1.08114	1.09527	5.57152	0.0616823	371	0.0433925	0.0631795	333	0.0484479	0.0632653	405	0.993624	0
wue1_expert1_model4	1	1.10016	1.10856	7.99909	0.018324	337	0.0136129	0.0941565	309	0.0206593	0.0869066	411	0.929955	0.000161323
wue1_expert2_model1	1	1.11567	1.12868	9.28043	0.00965564	317	0.00632384	0.115255	305	0.0177428	0.0912109	435	0.637304	0.00403307
wue1_expert2_model2	1	1.12581	1.12555	10.6516	0.00486445	296	0.00263979	0.139703	302	0.0157987	0.0945074	444	0.538349	0.00681589
wue1_expert2_model3	1	1.14559	1.13898	10.8776	0.00434471	302	0.00341276	0.132478	290	0.00976899	0.108279	445	0.527849	0.0071699
wue1_expert2_model4	1	1.13506	1.13739	10.8976	0.00430155	299	0.00300367	0.136067	293	0.0110438	0.104748	444	0.538349	0.00681589
wue1_expert3_model1	1	1.13918	1.14471	10.5867	0.00502484	310	0.00476341	0.123144	285	0.0079335	0.114293	435	0.637304	0.00403307
wue1_expert3_model2	1	1.13122	1.12051	10.205	0.00608146	306	0.00403709	0.127768	298	0.0134991	0.0989938	437	0.614657	0.00458874
wue1_expert3_model3	1	1.15055	1.14574	11.8784	0.00263416	296	0.00263979	0.139703	277	0.0056321	0.124254	447	0.507166	0.00790482
wue1_expert3_model4	1	1.09693	1.09181	8.73359	0.0126918	326	0.00899963	0.105497	313	0.0239853	0.0827063	460	0.383741	0.0135556
wue1_expert4_model1	1	1.10032	1.11479	6.91189	0.0315575	346	0.0188296	0.0853573	325	0.0368884	0.0707296	411	0.929955	0.000161323
wue1_expert4_model2	1	1.14561	1.13243	13.0888	0.00143815	271	0.000850497	0.171871	287	0.00862699	0.111868	460	0.383741	0.0135556
wue1_expert4_model3	1	1.10529	1.14357	14.7672	0.000621368	292	0.00221725	0.144626	228	0.000531948	0.194346	409	0.955392	7.1699e-05
wue1_expert4_model4	1	1.11086	1.12735	9.93191	0.00697129	314	0.00560603	0.118604	293	0.0110438	0.104748	426	0.743189	0.0019762
wue1_expert5_model1	1	1.11	1.12951	9.98498	0.00678872	311	0.00496257	0.122001	295	0.0119738	0.102427	424	0.767483	0.00161771
wue1_expert5_model2	1	1.11668	1.13711	9.96809	0.00684631	321	0.00740934	0.110865	284	0.00760584	0.115515	414	0.891941	0.000362976
wue1_expert5_model3	1	1.11779	1.12804	7.87751	0.0194724	337	0.0136129	0.0941565	313	0.0239853	0.0827063	426	0.743189	0.0019762
wue1_expert5_model4	1	1.11986	1.15336	11.9312	0.00256548	306	0.00403709	0.127768	262	0.00286911	0.144053	413	0.904589	0.000286796
