# Supplementary material for: On the objectivity, reliability, and validity of deep learning enabled bioimage analyses
Source: eLife journal article supplement (doi:10.7554/elife.59780), 2020-10-19
Supplement: supp [file stat_results_behavior_wue1-2.xlsx]

## Sheet: Sheet1
Measure	Mean_grp1	Mean_grp2	Mean_grp3	Mean_grp4	ANOVA_ok	ddof1	ddof2	ANOVA_F_stat	ANOVA_p_value	T_test_dof_grp1_2	T_test_T_stat_grp1_2	T_test_pval_grp1_2	T_test_dof_grp1_3	T_test_T_stat_grp1_3	T_test_pval_grp1_3	T_test_dof_grp1_4	T_test_T_stat_grp1_4	T_test_pval_grp1_4	T_test_dof_grp2_3	T_test_T_stat_grp2_3	T_test_pval_grp2_3	T_test_dof_grp2_4	T_test_T_stat_grp2_4	T_test_pval_grp2_4	T_test_dof_grp3_4	T_test_T_stat_grp3_4	T_test_pval_grp3_4	Kruskal_Wallis_ANOVA_H_stat	Kruskal_Wallis_ANOVA_pval	MWU_U_stat_grp1_2	MWU_pval_grp1_2	MWU_U_stat_grp1_3	MWU_pval_grp1_3	MWU_U_stat_grp1_4	MWU_pval_grp1_4	MWU_U_stat_grp2_3	MWU_pval_grp2_3	MWU_U_stat_grp2_4	MWU_pval_grp2_4	MWU_U_stat_grp3_4	MWU_pval_grp3_4
freeze	1.76972	15.0036	6.79762	55.5926	FALSE	3	22	40.874	3.622e-09	5.94	-4.924	0.00272347	12	-2.737	0.0180298	5.11	-7.157	0.000754584	8.77	2.682	0.0256685	10	-5.133	0.000442362	5.49	-6.37	0.000989909	20.8943	0.000110735	0	0.00323167	6	0.0208808	0	0.00323167	36	0.0383188	0	0.00507487	0	0.00340524
distance	3150.51	2188.27	2458.64	711.767	TRUE	3	22	19.484	2.14045e-06	8.9	2.872	0.0186312	12	1.907	0.0807475	10.36	6.712	4.45865e-05	10.59	-1.043	0.320029	10	5.682	0.000203222	10.9	5.927	0.000102876	16.4571	0.000913758	36	0.0383188	37	0.125201	42	0.00340524	16	0.520317	36	0.00507487	42	0.00340524
