# Supplementary material for: On the objectivity, reliability, and validity of deep learning enabled bioimage analyses
Source: eLife journal article supplement (doi:10.7554/elife.59780), 2020-10-19
Supplement: supp [file stat_results_variation_per_effect.xlsx]

## Sheet: Sheet1
Measure	Mean_grp1	Mean_grp2	Mean_grp3	ANOVA_ok	ddof1	ddof2	ANOVA_F_stat	ANOVA_p_value	T_test_dof_grp1_2	T_test_T_stat_grp1_2	T_test_pval_grp1_2	T_test_dof_grp1_3	T_test_T_stat_grp1_3	T_test_pval_grp1_3	T_test_dof_grp2_3	T_test_T_stat_grp2_3	T_test_pval_grp2_3	Kruskal_Wallis_ANOVA_H_stat	Kruskal_Wallis_ANOVA_pval	MWU_U_stat_grp1_2	MWU_pval_grp1_2	MWU_U_stat_grp1_3	MWU_pval_grp1_3	MWU_U_stat_grp2_3	MWU_pval_grp2_3
std				FALSE	2	87	17.276	4.80864e-07	58	-3.34	0.00146905	58	-5.211	2.60034e-06	58	-3.211	0.00215607	26.4724	1.78482e-06	264	0.00609714	121	1.19368e-06	253	0.00367089
