# Supplementary figures and images for: On the objectivity, reliability, and validity of deep learning enabled bioimage analyses
Source: eLife journal article supplement (doi:10.7554/elife.59780), 2020-10-19

A

Lab-Mue

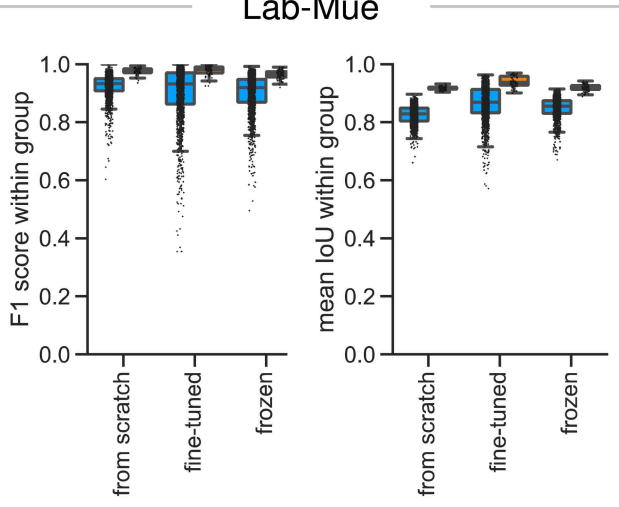

B

Lab-Inns1

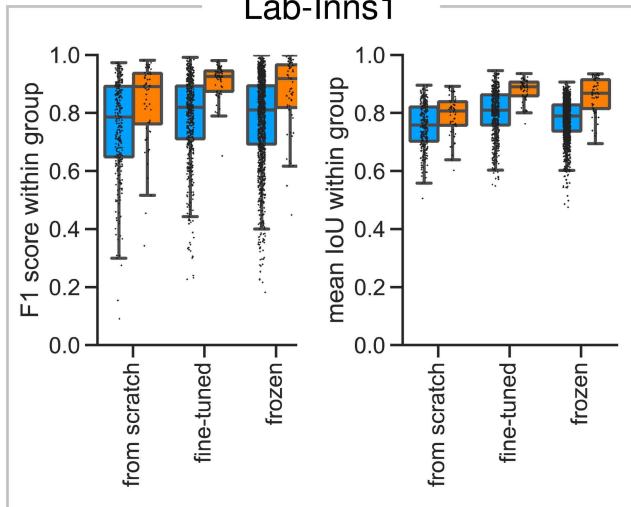

C

Lab-Inns2

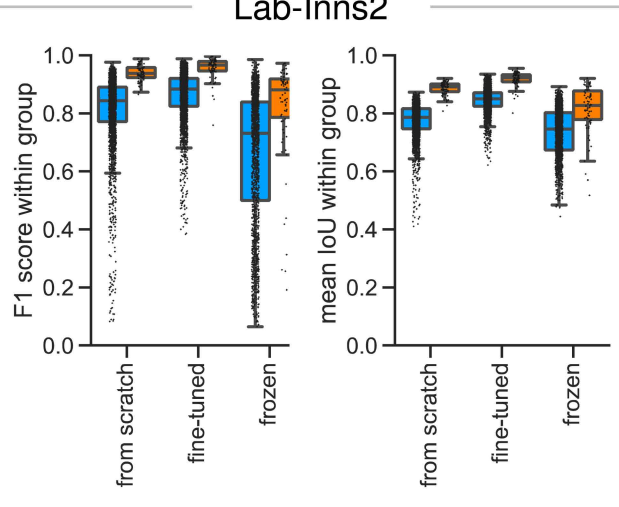

D

Lab-Wue2

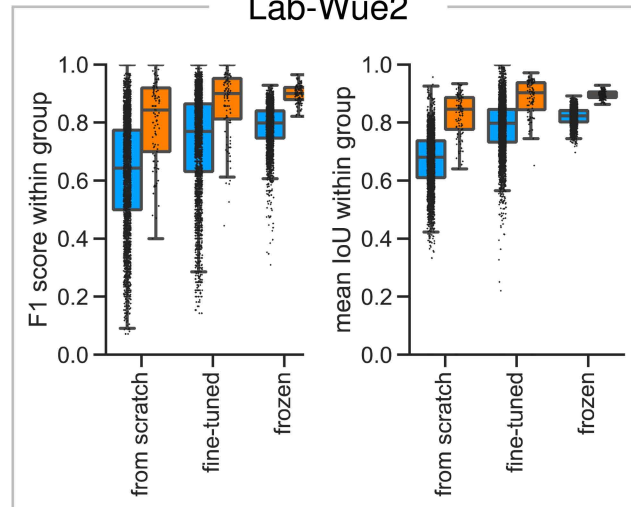

Supplement: supp [file elife-59780-supp-v1.zip]

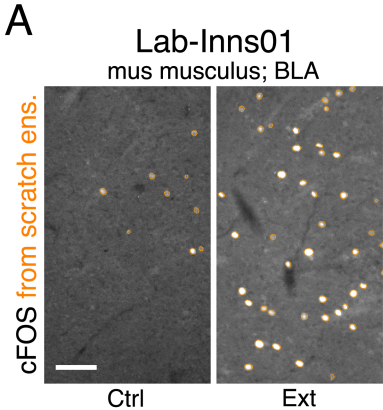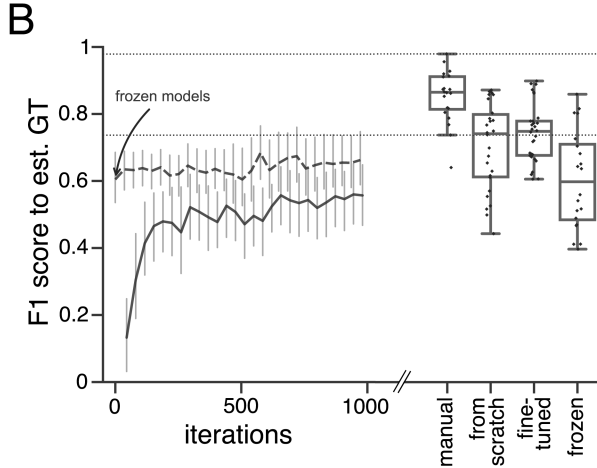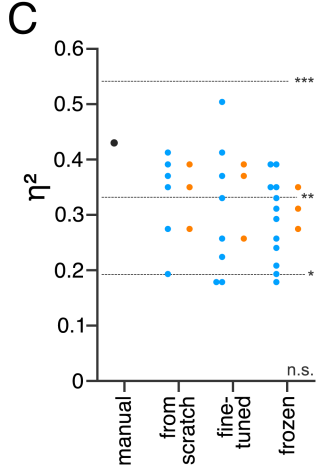

Supplement: supp [file elife-59780-supp-v1.zip]

A

Lab-Mue

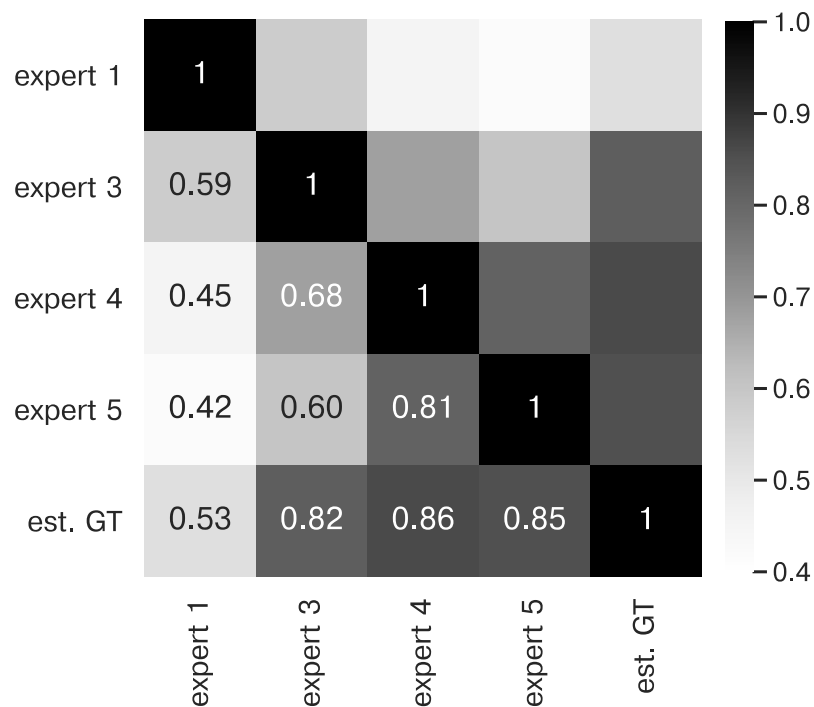

B

Lab-Inns1

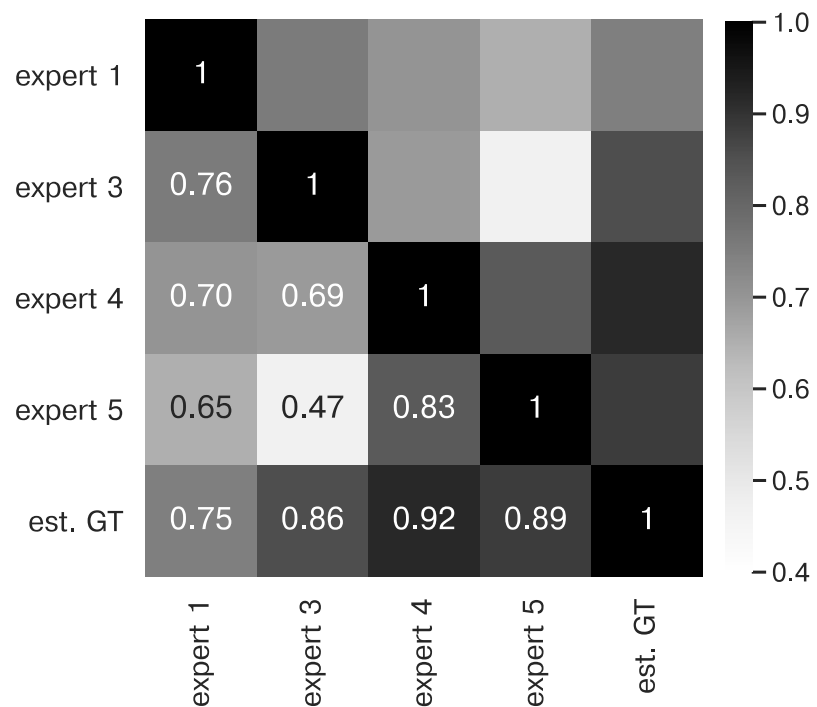

C

Lab-Inns2

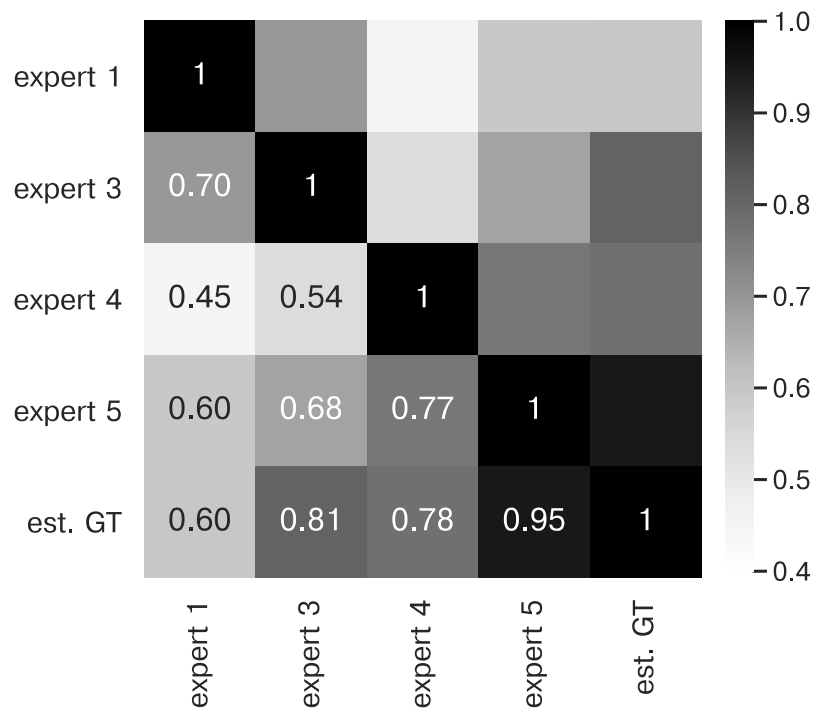

D

Lab-Wue1

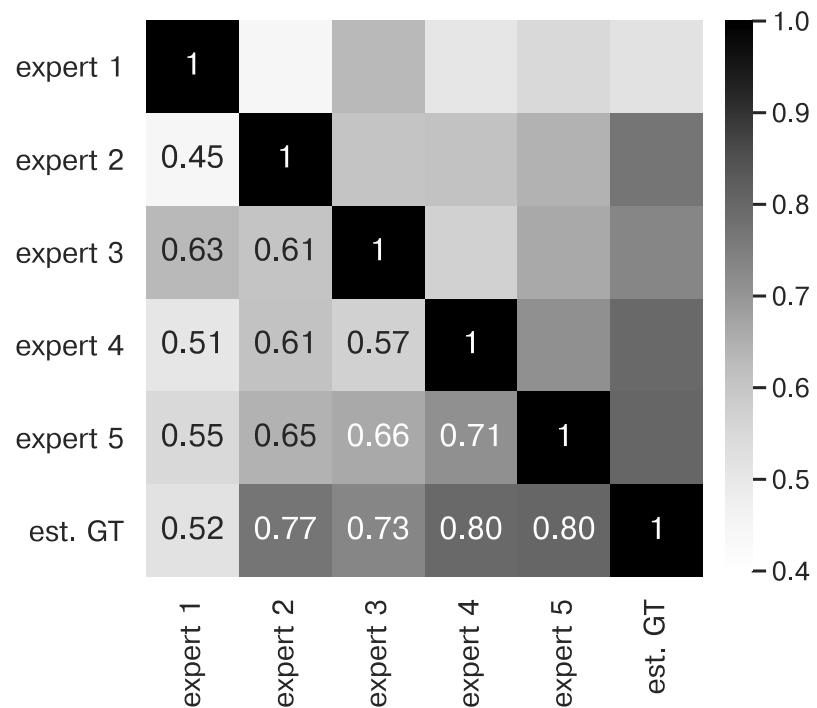

E

Lab-Wue2

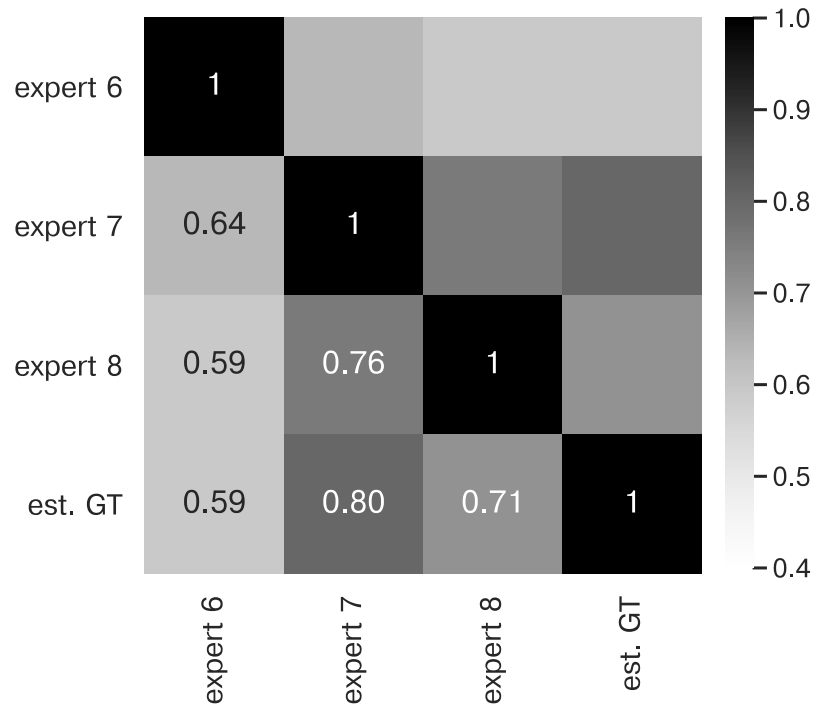

Supplement: supp [file elife-59780-supp-v1.zip]

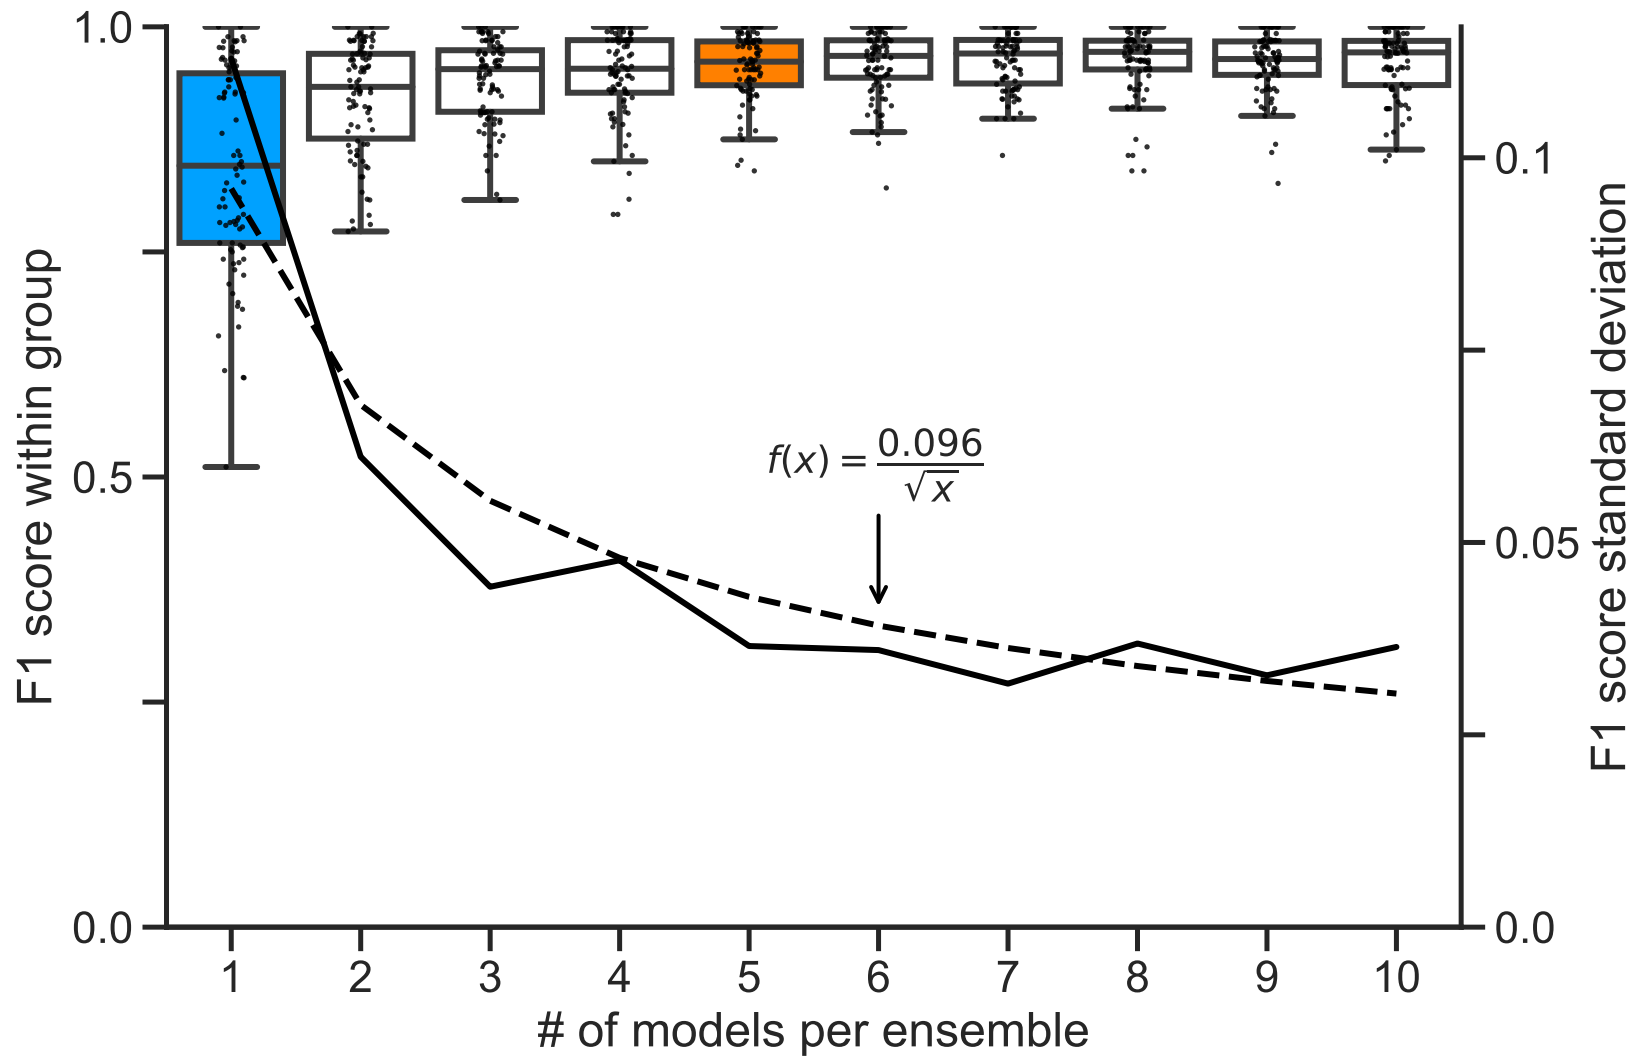

Supplement: supp [file elife-59780-supp-v1.zip]

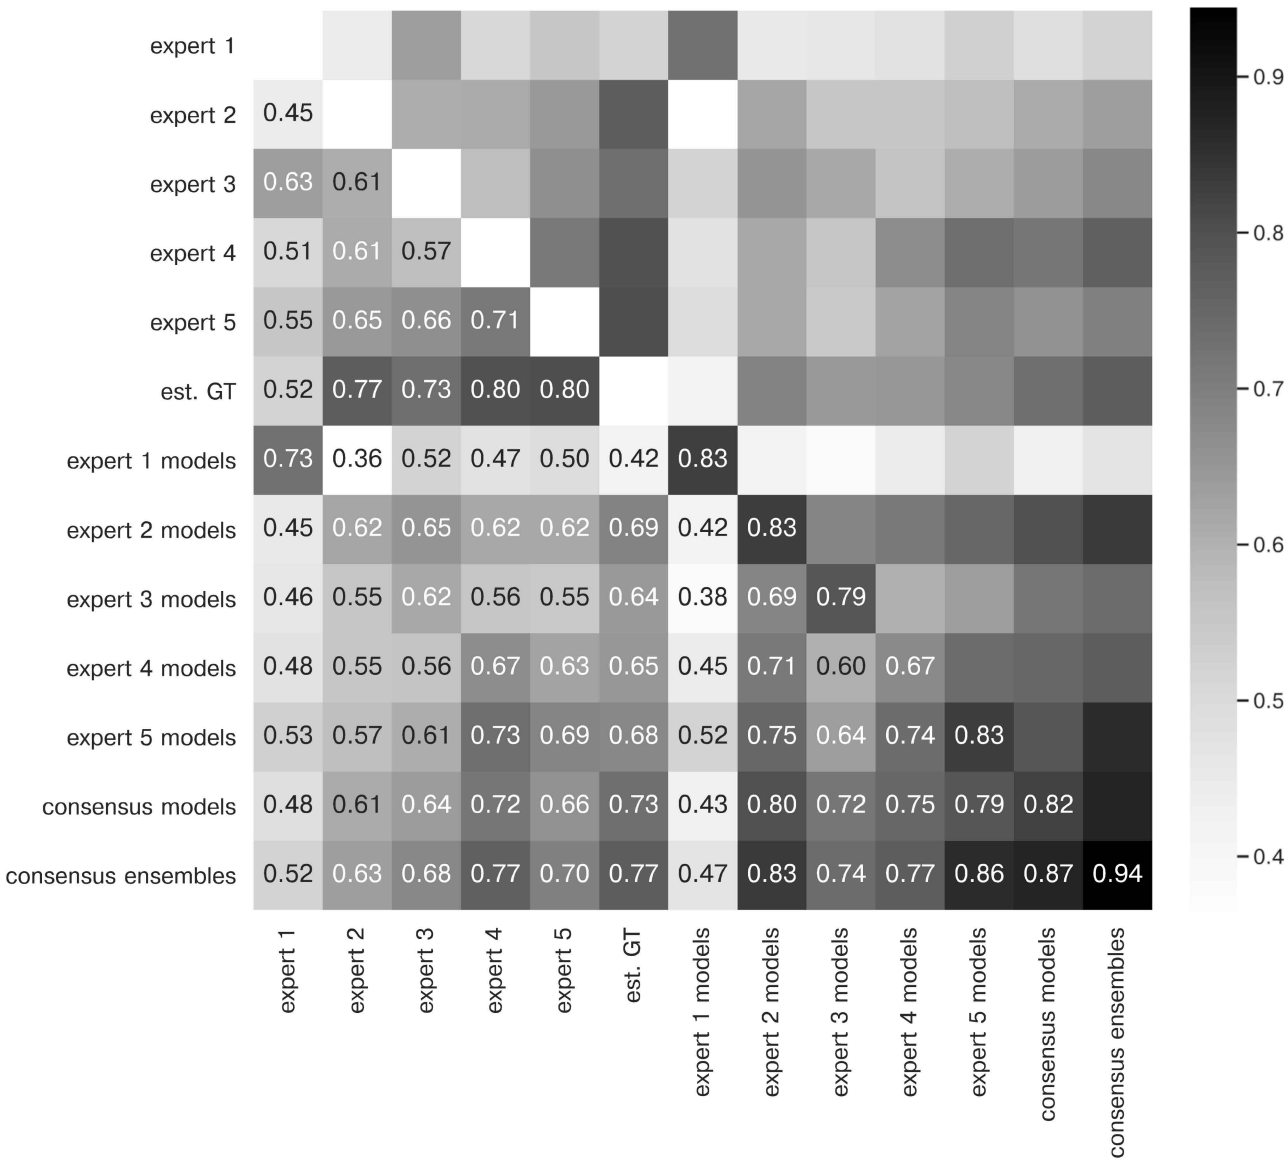

Supplement: supp [file elife-59780-supp-v1.zip]

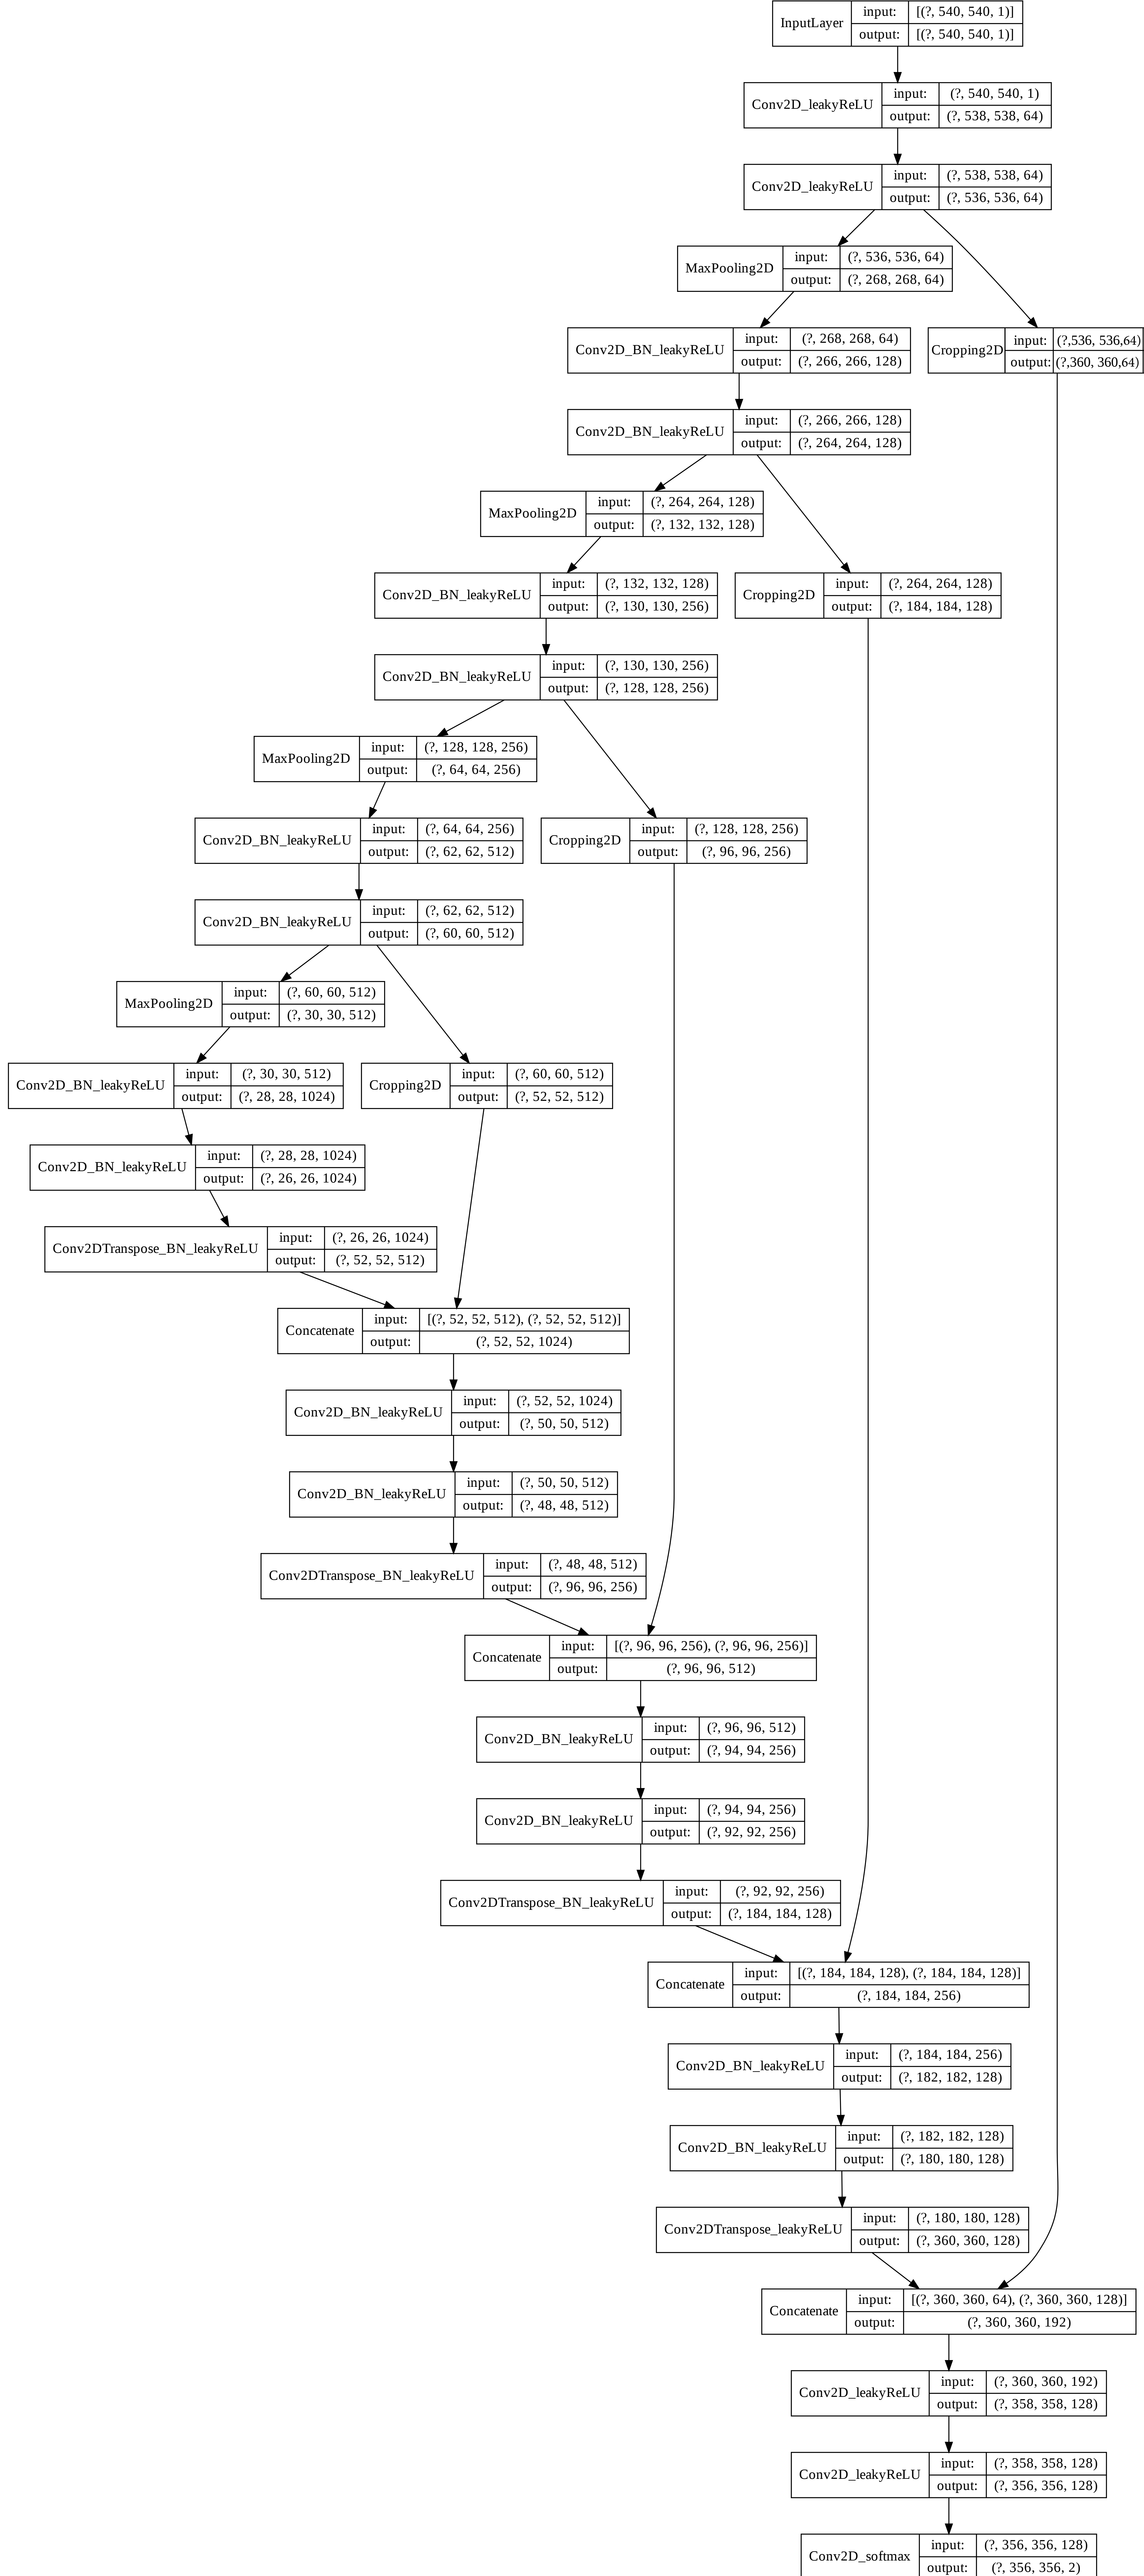

Supplement: supp [file elife-59780-supp-v1.zip]

**A**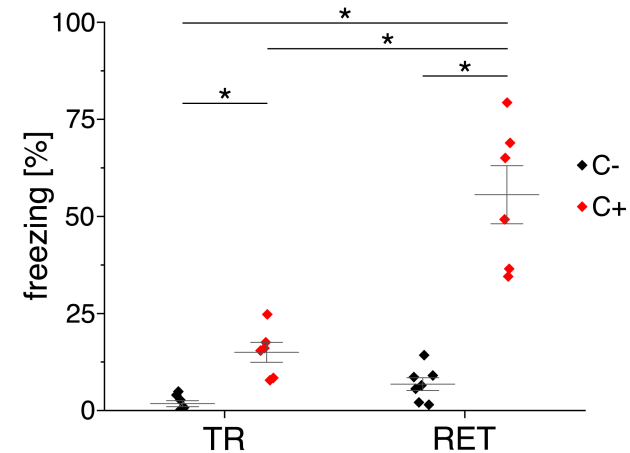**B**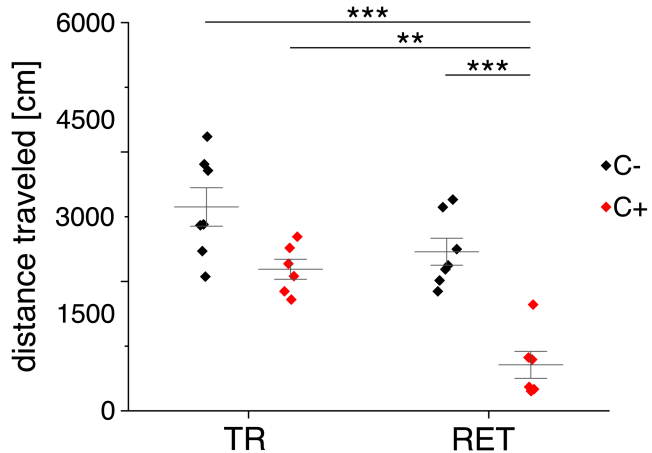

Supplement: supp [file elife-59780-supp-v1.zip]

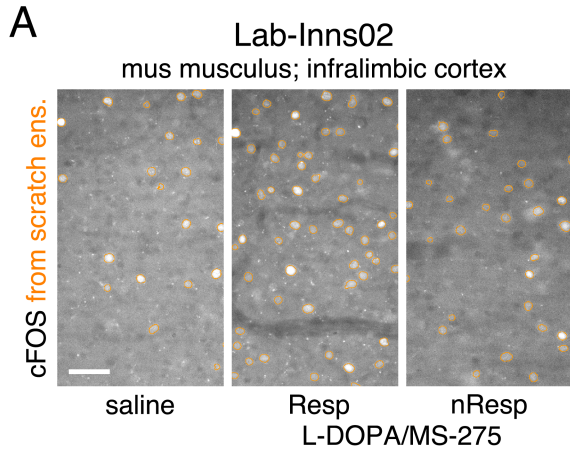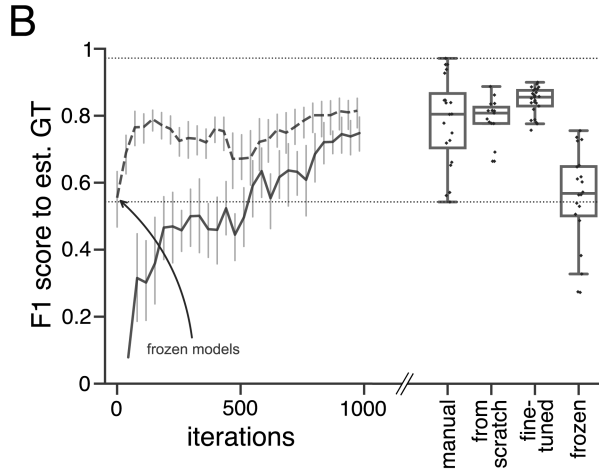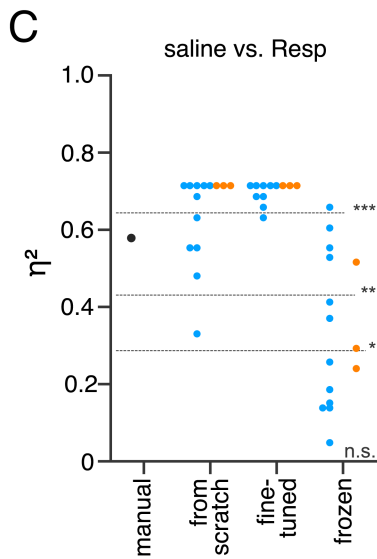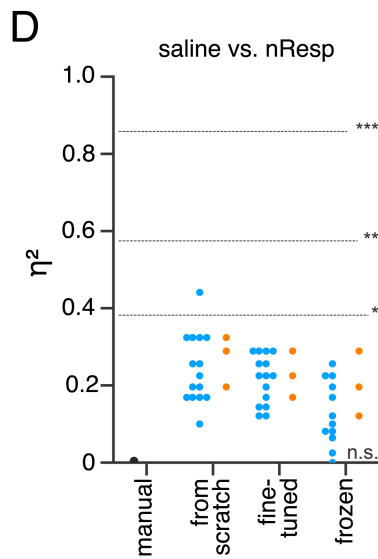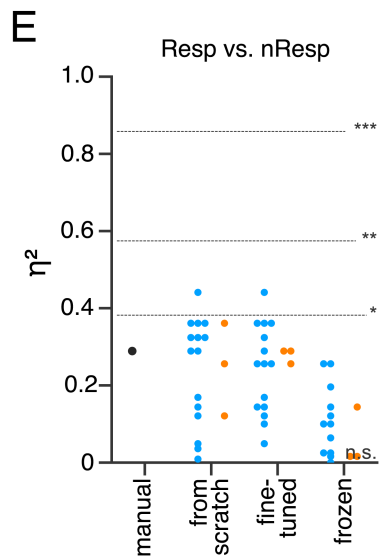

Supplement: supp [file elife-59780-supp-v1.zip]

A

Lab-Mue

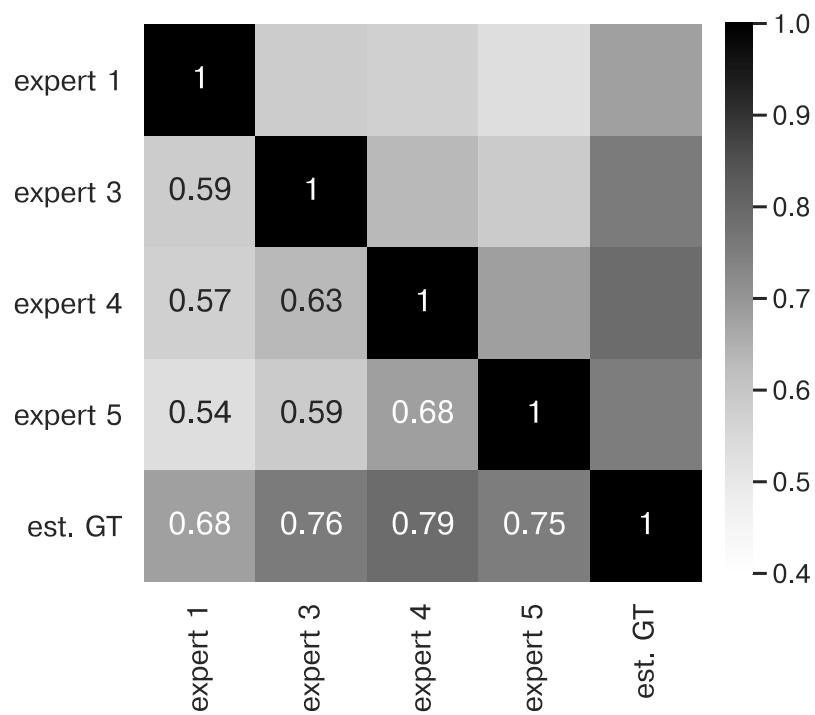

B

Lab-Inns1

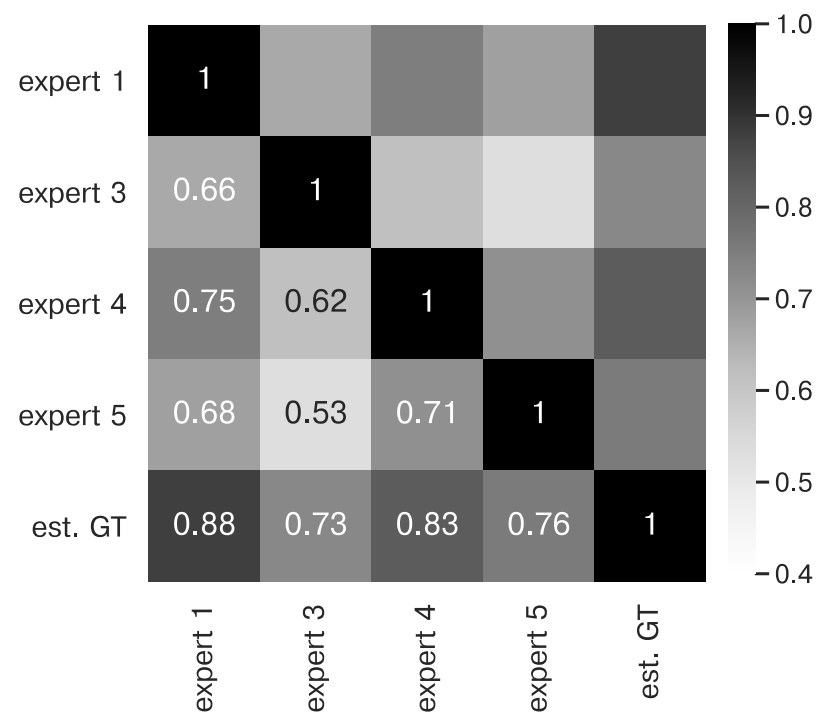

C

Lab-Inns2

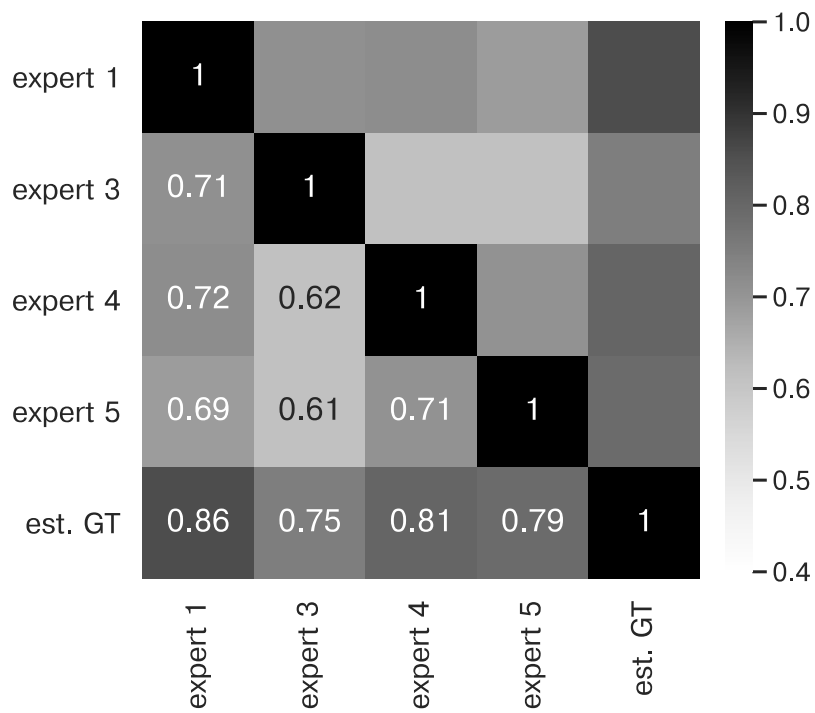

D

Lab-Wue1

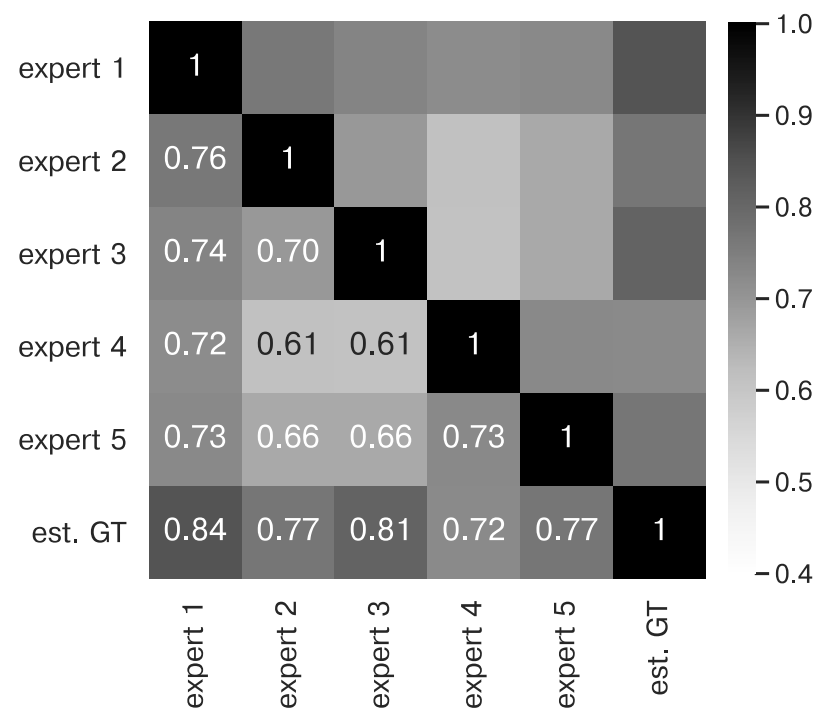

E

Lab-Wue2

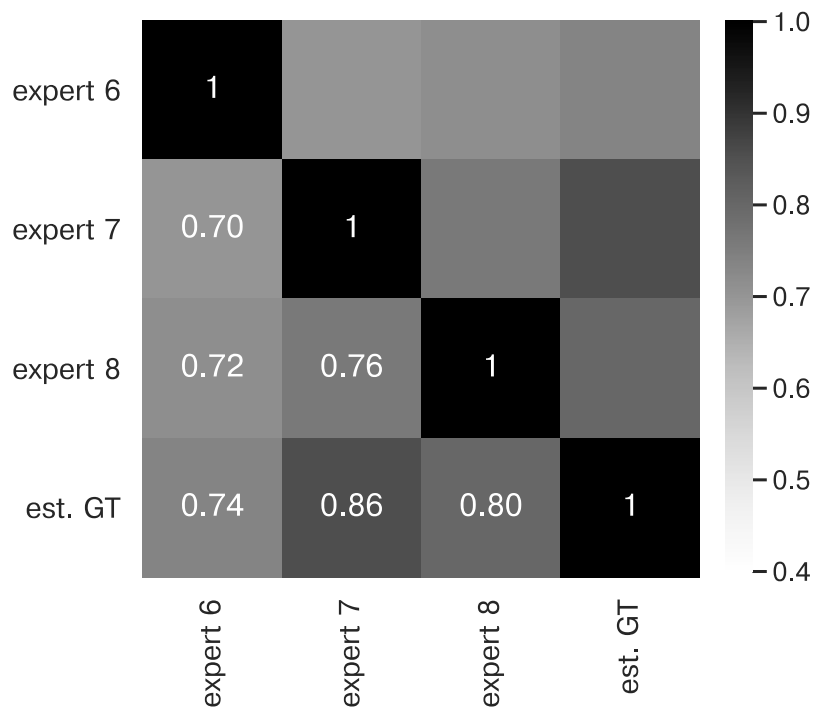

Supplement: supp [file elife-59780-supp-v1.zip]

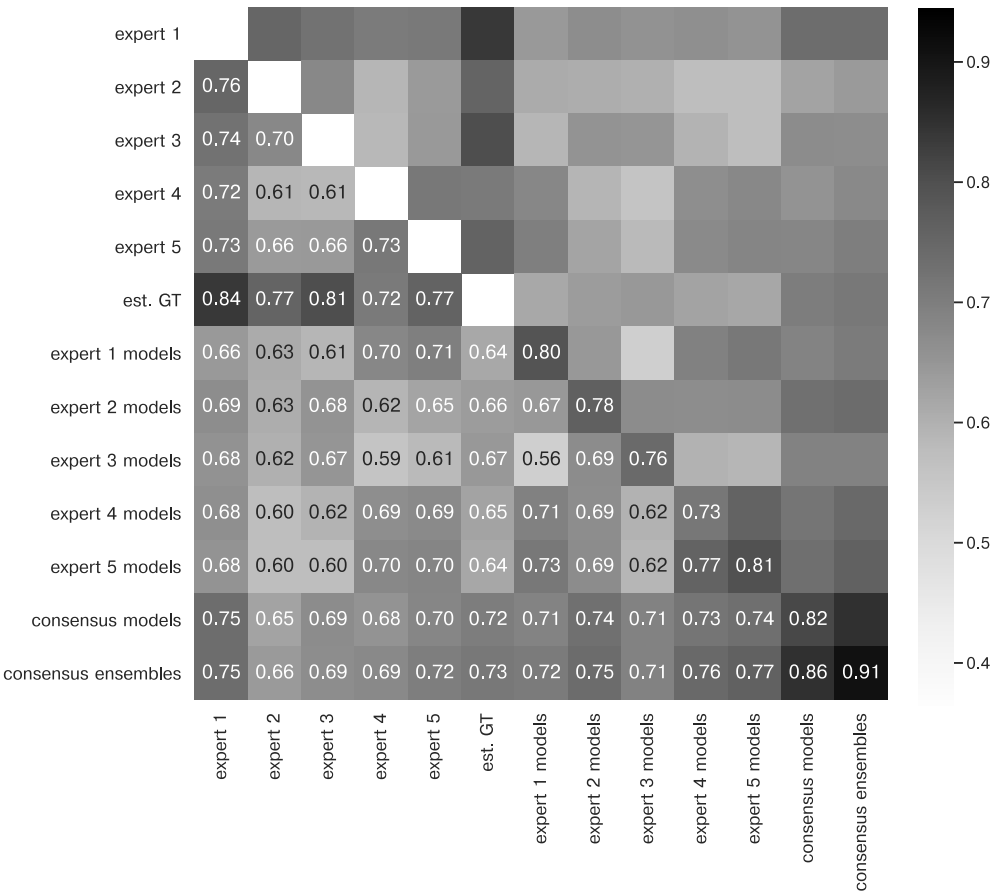

Supplement: supp [file elife-59780-supp-v1.zip]
